1 Modeling stem cell nucleus mechanics using confocal microscopy

2

3 Kennedy Z<sup>1</sup>, Newberg J<sup>1</sup>, Goelzer M<sup>1</sup>, Stefan Judex<sup>2</sup>, Fitzpatrick CK<sup>1</sup>, Uzer G<sup>1</sup>†

4 <sup>1</sup>Mechanical and Biomedical Engineering, Boise State University

5 <sup>2</sup>Biomedical Engineering, Stony Brook University

6

7 † **Corresponding Author:**

8 Gunes Uzer PhD

9 Boise State University

10 Department of Mechanical and Biomedical Engineering

11 1910 University Drive, MS-2085

12 Boise, ID 83725-2085

13 Ph. (208) 426-4461

14 **Email:** [gunesuzer@boisestate.edu](mailto:gunesuzer@boisestate.edu)

15

16 **Funding:** NASA ISGC NNX15AI04H, NIH R01AG059923, and 5P2CHD086843-03,

17 P20GM109095, P20GM103408 and NSF 1929188.

18

19 **Authors' contributions**

20 **Kennedy Z** data analysis/interpretation, manuscript writing, final approval of manuscript.

21 **Newberg J** data analysis/interpretation, data analysis.

22 **Goelzer M** data analysis/interpretation, data analysis, final approval of manuscript.

23 **Judex S** data analysis/interpretation, manuscript writing, final approval of manuscript

24 **Fitzpatrick CK** financial support, data analysis/interpretation, final approval of manuscript

25 **Uzer G** concept/design, financial support, data analysis/interpretation, manuscript writing, final

26 approval of manuscript

27

## 28 **Conflicts of interest/Competing interests**

29 The author(s) declare no competing interests financial or otherwise.

30

## 31 **Ethics approval**

32 All methods were carried out in accordance with relevant guidelines and regulations of Boise

33 Institutional Animal Care and Use Committee and Institutional Biosafety Committee. All

34 procedures were approved by Boise State University Institutional Animal Care and Use

35 Committee, and Institutional Biosafety Committee.

36

## 37 **Consent for publication**

38 All authors consent to publication

39

## 40 **Availability of data and material**

41 The datasets generated and/or analyzed during the current study are available from the

42 corresponding author on reasonable request.

43

## 44 **Code availability**

45 The code generated and/or analyzed during the current study are available from the

46 corresponding author on reasonable request.

47

## 48 **Abstract**

49 Nuclear mechanics is emerging as a key component of stem cell function and differentiation.

50 While changes in nuclear structure can be visually imaged with confocal microscopy,

51 mechanical characterization of the nucleus and its sub-cellular components require specialized

52 testing equipment. A computational model permitting cell-specific mechanical information

53 directly from confocal and atomic force microscopy of cell nuclei would be of great value. Here,  
54 we developed a computational framework for generating finite element models of isolated cell  
55 nuclei from multiple confocal microscopy scans and simple atomic force microscopy (AFM)  
56 tests. Confocal imaging stacks of isolated mesenchymal stem cells (MSC) were converted into  
57 finite element models and siRNA-mediated LaminA/C depletion isolated chromatin and  
58 LaminA/C structures. Using AFM-measured experimental stiffness values, a set of conversion  
59 factors were determined for both chromatin and LaminA/C to map the voxel intensity of the  
60 original images to the element stiffness, allowing the prediction of nuclear stiffness in an  
61 additional set of other nuclei. The developed computational framework will identify the  
62 contribution of a multitude of sub-nuclear structures and predict global nuclear stiffness of  
63 multiple nuclei based on simple nuclear isolation protocols, confocal images and AFM tests.

64

65 **Key words:** Finite Element Analysis, Mesenchymal Stem Cells, Nucleus, Mechanobiology,  
66 LaminA/C, Chromatin, Confocal Microscopy

67

## 68 **Introduction**

69 All living organisms function in and adapt to mechanically active environments at the levels of  
70 the organ, tissue, and cell. Mesenchymal stem cells (MSC) are the tissue resident stem cells of  
71 musculoskeletal tissues that, at least in part, regulate the adaptive response to mechanical  
72 challenge by proliferating and differentiating into distinct cell types<sup>1</sup>. MSC stem cell  
73 differentiation is heavily influenced by the stiffness of the extracellular matrix<sup>2</sup>. For instance,  
74 plating MSCs onto soft or stiff substrates can drive MSC differentiation towards adipogenesis or  
75 osteogenesis, respectively<sup>3</sup>. The means by which MSC can sense the stiffness of its  
76 extracellular matrix comprise an interplay of focal adhesions, the cytoskeleton, and the nucleus<sup>4</sup>.  
77 When a MSC is placed onto a stiffer extracellular matrix, the cell will increase its size and the  
78 number of focal adhesions to its extracellular matrix<sup>5</sup>, promoting cell traction within the

79 extracellular matrix<sup>4</sup>. As the cell spreads on the extracellular matrix, actin microfilaments tug on  
80 the nucleus causing it to stretch and deform<sup>6</sup>. These changes in the nuclear structure are critical  
81 for cell function. For example, the nuclear membrane is covered with nuclear pore complexes  
82 that are sensitive to cytoskeletal deformations of the nucleus<sup>7</sup>. When these pores are opened,  
83 the transcriptional factors such as YAP/TAZ are allowed into the nucleus to regulate gene  
84 expression<sup>8</sup>. Further, chromatin itself is responsive to mechanical challenge, as the application  
85 of mechanical forces can alter heterochromatin dynamics and organization<sup>9,10</sup>. While signaling  
86 events such as YAP/TAZ and DNA changes are areas of active research, probing nuclear  
87 mechanical properties in living cells remain challenging.

88

89 Quantifying the bulk mechanical properties of the nucleus can be performed via atomic force  
90 microscopes, micropipette setups, optical tweezers, or microfluidics<sup>11</sup>. While single-cell level  
91 optical methods to measure intra-nuclear deformations are emerging<sup>12</sup>, cellular FE models that  
92 can capture nuclear structure and predict nuclear mechanics of many nuclei could provide  
93 mechanistic information on cell's mechanical properties and at the same time, present a time-  
94 saving and cost-effective alternative. The stiffness of the nucleus is primarily affected by two  
95 nuclear components, LaminA/C and chromatin<sup>13</sup>. LaminA/C is a protein that scaffolds the inner  
96 nuclear membrane, adding mechanical stiffness to the nucleus while Lamin B does not  
97 contribute to nuclear mechanics<sup>14</sup>. Chromatin is made of compact DNA and histones that  
98 occupies the interior of the nucleus and also provides mechanical competence<sup>15,16</sup>. Thus,  
99 inclusion of these two components is essential for modeling nuclear mechanics.

100

101 Here, we propose and validate a method that uses imaging intensity data from confocal images  
102 from LaminA/C and chromatin to determine nuclear mechanical properties. To this end, we  
103 developed a computational framework capable of producing confocal-image-based finite  
104 element models of an MSC nucleus that replicates the structural configuration of both chromatin

105 and LaminA/C. Finite element models constructed with image intensity based elasticity values  
106 were calibrated using experimental AFM measurements of cell nuclei with or without LaminA/C.  
107 This model was then tested in its ability to predict the stiffness of two additional test nuclei.

108

## 109 **Data Collection, Modeling, Simulation Setup and Methods**

### 110 Cell Culture

111 MSCs were harvested from the bone marrow of 8-wk old male C57BL/6J mice as previously  
112 described.<sup>17,18</sup> Cells used for the experiments were between passage 7 and passage 11. Cells  
113 were sub-cultured at a density of 1,800 cells/cm<sup>2</sup> and maintained within IMDM (12440053,  
114 GIBCO) with 10% FCS (S11950H, Atlanta Biologicals) with 1% Pen/strep (GIBCO).

115

### 116 Nucleus Isolation

117 MSCs were scraped off their plates using 9 mL of 1x PBS and centrifuged at 1100 RPM at 4°C  
118 with a Beckman Coulter Allegra X-30R Centrifuge. MSCs were suspended within 500 µL  
119 hypotonic buffer A (.33M Sucrose, 10mM HEPES, pH 7.4, 1mM MgCl<sub>2</sub>, 0.5% w/v Saponin) and  
120 centrifuged twice at 3000 RPM, 4°C for 10 minutes using a Beckman Coulter Microfuge 20R  
121 Centrifuge. Cytoplasmic supernatant was aspirated away and the remaining nuclei were  
122 resuspended using 100 µL of hypotonic buffer A. Cytoplasmic debris was separated from the  
123 nuclei by adding 400 µL of Percoll. The resulting mixture was centrifuged at 10,000 RPM at 4°C  
124 for 10 minutes. Nuclei were then plated in a .01 Poly-L-Lysine coated 35 mm cell culture dish  
125 and incubated for 25 minutes.

126

### 127 Nucleus Stiffness Data Using AFM

128 Force-displacement curves of isolated nuclei were acquired using a Bruker Dimension FastScan  
129 Bio AFM. Tipless MLCT-D probes (0.03 N/m spring constant) were functionalized with 10 µm  
130 diameter borosilicate glass beads (Thermo Scientific 9010, 10.0 ± 1.0 µm NIST-traceable 9000

131 Series Glass Particle Standards) prior to AFM experiments using UV-curable Norland Optical  
132 Adhesive 61 and, a thermal tune was conducted on each probe immediately prior to use to  
133 determine its spring constant and deflection sensitivity. Nuclei were located using the AFM's  
134 optical microscope and engaged with a 2-3nN force setpoint to ensure contact prior to testing.  
135 After engaging on a selected nucleus, force curve ramping was performed at a rate of 2  $\mu\text{m}/\text{sec}$   
136 over 2  $\mu\text{m}$  total travel (1  $\mu\text{m}$  approach, 1  $\mu\text{m}$  retract). Three replicate force-displacement curves  
137 were acquired and saved for each nucleus tested, with at least 3 seconds of rest between  
138 conducting each test. Measurements that showed less than 600 nm contact with the nucleus  
139 were discarded. Measured force-displacement curves were then exported into Matlab  
140 (Mathworks, Natick, MA) to generate a curve of points that reflects the mean of the force to  
141 displacement curve as well as the standard deviation of the atomic force microscopy  
142 experiments.

143

#### 144 Nucleus Imaging

145 A single group of MSC was grown within control conditions and isolated using the methods  
146 described above. The chromatin of the nuclei was then stained with Hoechst 33342 while the  
147 LaminA/C was stained with mAB 4777 (Abcam). 5 nuclei were then imaged using a Nikon A1  
148 confocal microscope at a rate of .2  $\mu\text{m}$  out of plane and .05  $\mu\text{m}$  in plane resolution.

149

#### 150 Measuring Stiffness of Intact and LaminA/C Depleted Cell Nuclei

151 As we sought to model nuclear stiffness based on confocal images of LaminA/C and chromatin,  
152 we first obtained mechanical properties of cell nuclei isolated from live MSCs with or without  
153 LaminA/C. Two groups of MSCs were cultured in growth media (IMDM, 10% fetal bovine serum,  
154 1% Pen Strep). One group received a LaminA/C specific siRNA treatment (siLamin), ceasing  
155 LaminA/C mRNA expression in MSCs while the other group was treated with a non-specific  
156 control siRNA (siControl). 48h after siRNA treatment, cell nuclei were isolated, plated onto 0.1%

157 Poly-L-Lysine coated plates for adherence and subjected to AFM testing to obtain force-  
158 displacement curves as we reported previously (**Fig. 1a**)<sup>19</sup>. As shown in immunolabeled nuclei  
159 images (**Fig. 1b**), isolated control nuclei appeared round and maintained intact LaminA/C (red)  
160 and DNA (blue) confirmation. Shown in **Fig.1c**, force-displacement curves for siControl (N=30)  
161 and siLamin (N=73) groups were obtained by shows that the maximum force measured at the  
162 AFM tip for the siLamin group was, on average, 59% smaller than the siControl group ( $p < 0.05$ ,  
163 Fig. 1c), confirming that nuclei are softer without LaminA/C<sup>14</sup>.

164

### 165 Mesh Generation from Confocal Scans

166 To model the contribution of LaminA/C and chromatin separately, we generated two volumetric  
167 meshes from each nucleus image. The first mesh was generated using the chromatin signal of  
168 the nucleus image and the second one was generated using the LaminA/C signal of the nucleus  
169 image. For chromatin, the 3D confocal image of the chromatin was imported into Amira software  
170 (ThermoFisher, MA) and the nucleus geometry was manually segmented (**Fig. 2a**). A surface  
171 mesh was created that employed triangular S3 elements surrounding the nucleus geometry  
172 (**Fig. 2b**). This surface mesh was then imported into Hypermesh (Altair Engineering, MI) to  
173 create a volume mesh with C3D4 tetrahedral elements (**Fig. 2c**). The resulting volume mesh  
174 was imported into Bonemat software (<http://www.bonemat.org/>) (**Fig. 2d**) to overlay the  
175 volumetric mesh onto the original confocal image and to assign stiffness values to each  
176 tetrahedral element using the average voxel intensity (HU) within each element (Equation 1):

$$177 \quad E = a + b * HU^c \quad (\text{Equation 1})$$

178 The term **a**, representing the intensity-independent elastic modulus, was set to “0” to eliminate  
179 any contribution to elasticity outside the image intensity. Terms **b** and **c** are a set of conversion  
180 factors defined during each experiment. Here, we used a linear isotropic elastic material  
181 definition with a Poisson’s ratio of 0.5 for each model<sup>20</sup>. For this study, FE meshes were  
182 generated for five isolated nuclei. Two representations of each nucleus were generated; one

183 that included both LaminA/C and chromatin, and one which included only chromatin. All the  
184 nuclei were imaged via a Nikon A1 confocal microscope with an image depth of .2  $\mu\text{m}$  and a  
185 voxel width of .05  $\mu\text{m}$ .

186

187 To generate a model that contains both LaminA/C and chromatin (i.e. LaminA/C + chromatin  
188 mesh), two identical nucleus geometries were produced. Chromatin meshes were assigned  
189 elasticity values using the siLamin nuclei force-displacement curves (i.e. no LaminA/C present).  
190 While siRNA procedure does not deplete the entire LaminA/C protein levels, a large decrease in  
191 measured force value (**Fig.1c**) shows a substantial decline. The effectiveness of this siRNA  
192 procedure was confirmed in a recent publication<sup>21</sup>. Conversion factors for the LaminA/C meshes  
193 were derived via utilizing the chromatin mesh elasticity values and the the AFM data for intact  
194 nuclei (i.e. siControl nuclei with both Lamin A/C and chromatin present). The chromatin and  
195 LaminA/C elasticities in each element were then linearly added to produce the siControl model  
196 containing the elasticity of both structures.

197

### 198 Replicating AFM Experiments *in silico*

199 Atomic force microscopy simulations were performed in ABAQUS software (2019, Dassault  
200 Systemes, France). A replica of the AFM test setup was modeled *in silico* (**Fig. 2e**). The bottom  
201 node layer of the nucleus model (red) was fixed to a rigid plane in all orthogonal directions to  
202 simulate the nucleus being attached to the poly-L-Lysine coated plate surface. A simulated AFM  
203 tip (yellow) was created by positioning a sphere ( $r=5 \mu\text{m}$ ) made of C3D4 elements with a rigid  
204 body material definition above the nucleus model. Contact between the nucleus and the AFM tip  
205 was defined as a no-friction contact pair. During simulation, the AFM tip was lowered onto the  
206 nucleus until 1  $\mu\text{m}$  indentation was reached (**Fig. 2f**). The required force to indent the nucleus  
207 was recorded. The recorded force-displacement curves were used to quantify the root mean  
208 squared error (RMSE) between experimental and *in silico* conditions.



209

### 210 Determination of the Element Volume for Nucleus Models

211 To determine the dependence of the AFM indentation force on the volume of the mesh  
212 elements, nucleus models were constructed from 5 chromatin nuclei images with element  
213 volumes of 5, 4, 3, 2, 1, .8, and .6  $\mu\text{m}^3$ . The models were assigned temporary elasticity values  
214 using the original chromatin images with conversion factors of  $a = 0$ ,  $b = 20$ , and  $c = 1$ . The  
215 term  $a$  was set to 0 because of the assumption that there is no base elasticity independent of  
216 image intensity,  $b$  was set to 20 and  $c$  was set to 1 to scale elasticity *linearly* to image voxel  
217 intensity. A representative image for the meshes of nucleus#1, with varying element volumes  
218 and with the original images at each mid-orthogonal plane is depicted in **Fig. 3a**. Each nucleus  
219 model was subjected to *in silico* AFM experiments. For each nucleus model, the force  
220 generated at 1  $\mu\text{m}$  of indentation was recorded and plotted against element volume for each  
221 nucleus (**Fig.3b**). The mean maximum force value and standard deviation started to plateau for  
222 element volumes of 1  $\mu\text{m}^3$  or smaller, indicating this volume that can be used without affecting  
223 the maximum force output (green line).

224

### 225 Sensitivity of Image Noise to Element Volume

226 While force sensitivity analysis revealed a cut-off at 1  $\mu\text{m}^3$ , we also sought to quantify how well  
227 element volumes represented the spatial information from confocal images, as this may be  
228 important for discerning nuclear deformation patterns. To accomplish this, we only used a  
229 chromatin mesh without LaminA/C. Chromatin images for a single nucleus image (Nucleus #1)  
230 was converted into six finite element models meshed with average element sizes of 3, 2, 1.5, 1,  
231 .8, .6, and .3  $\mu\text{m}^3$  and assigned elasticity values using the temporary conversion factors  $a = 0$ ,  $b$   
232 = 20, and  $c = 1$ . A Matlab script extracted a 3D image from each mesh with the 2D image from a  
233 transverse plane ( $Z=7 \mu\text{m}$ ) (**Fig. 4**, top row).

234

235 These images were then superimposed onto the original image (**Fig. 4**, second row) and the  
236 intensity of each voxel was compared to each voxel in the original image, producing a color map  
237 indicating the percent difference (**Fig. 4**, third row). Microscopy noise in the confocal images  
238 was accounted for by comparing the average intensity of the DNA free region of interest to each  
239 voxel within that region (**Fig. S2**). This analysis produced an average error value of 13%,  
240 indicating the amount of inherent noise in the confocal images. This value was subtracted from  
241 each voxel to quantify the non-noise related error. These corrected voxel errors were then  
242 averaged to generate a final error value (**Fig.4**, bottom row). At  $3 \mu\text{m}^3$  element volume, the  
243 average error was 12.3%. As element size decreased, the % error also decreased. At  $1 \mu\text{m}^3$ ,  
244 the average error was 6.4%. For  $1 \mu\text{m}^3$  down to  $0.3 \mu\text{m}^3$ , the average error only changed by  
245 1.9% indicating a similar cut-off range where  $1 \mu\text{m}^3$  voxel volumes can represent 93.6% of the  
246 chromatin configuration.

247

#### 248 Response Surface Generation

249 To identify the sensitivity of the RMSE between experimental and *in silico* force-displacement  
250 curves to different combinations of the b and c terms, two response surfaces were generated;  
251 first, a coarse 8 X 8 matrix that was followed up by a finer 10 X 10 matrix. The c values were  
252 spaced linearly while the b values were spaced logarithmically because of the much greater  
253 change of b value, that minimized error, compared to the c value. To generate the RMSE  
254 between experimental and *in silico* force-displacement curves, all five nuclei confocal  
255 microscopy scans were converted to finite element models with an average element size of 1  
256  $\mu\text{m}^3$ . Each model was assigned elasticity values using the original image and the conversion  
257 factors for the given datapoint. All five nucleus models then underwent a simulated atomic force  
258 microscopy experiment where force-displacement data from the first  $1 \mu\text{m}$  of nucleus  
259 indentation was collected. The resulting force displacement curves were compared to the mean

260 atomic force microscopy curve taken from the experimental AFM indentations, calculating the  
261 RMSE. The RMSE of all 5 models were averaged to create each point of the response surface.

262

### 263 Conversion Factor Optimization

264 Nucleus models #1, #2, and #3 were selected and converted to finite element models with an  
265 element volume of  $1 \mu\text{m}^3$ . The matlab algorithm “fmincon” was set to use an “SQP” optimization  
266 algorithm with constraint/step tolerance set to  $1 \times 10^{-9} \mu\text{N}/\mu\text{m}^2$ . The  $c$  term was then constrained  
267 to either  $c = 1$  for linear material conversion or  $c = 0$  for homogeneous material value. A value  
268 of  $b = 1\text{E-}10 \mu\text{N}/\mu\text{m}^2$  was used as a starting point. This algorithm optimized the  $b$  value until the  
269 optimization constraint/step tolerance was met.

270

### 271 Statistical Analysis

272 Results were presented as mean  $\pm$  one standard deviation (SD) unless indicated in figure  
273 legends. For comparisons between groups, a non-parametric two-tailed Mann-Whitney U-test  
274 was used. P-values of less than 0.05 were considered significant.

275

## 276 **Results**

### 277 Linear relationship between voxel intensity and material property is sufficient for assigning 278 material properties for both SiLamin and SiControl models

279 To determine the best set of conversion factors for creating nuclei models containing a  
280 chromatin mesh only, an 8 X 8 response surface was generated to compare the simulated AFM  
281 results to experimental AFM data for the LaminA/C depleted nuclei (**Fig. 5a**). The  $b$  values were  
282 logarithmically spaced between  $1 \times 10^{-9} \mu\text{N}/\mu\text{m}^2$  and  $1 \times 10^{-3} \mu\text{N}/\mu\text{m}^2$  and  $c$  values were linearly  
283 spaced between 0.5 and 5. The error associated with each  $b$ - $c$  combination was found by  
284 generating the root mean squared error between the simulated and experimental AFM data.  
285 Results showed that for every  $c$  value, there was a  $b$  value that minimized the error. To expand

286 on this finding, we selected the two  $c$  values of 0.5 and 1.1 that produced a minimum value  
287 within our original 8 X 8 grid (green dotted boxes). Shown in **Fig.5b**, plotting a refined 10 X 10  
288 response surface around these two  $b$ - $c$  values, a minimum error along a straight line for  
289 different  $b$  values was visible (dotted red lines), suggesting that minimizing the error was  
290 independent of the initial  $c$  value. Shown in bottom right, setting  $c=1$  produced a similar set of  $b$   
291 values that minimized the error between the simulated and the real AFM experiments, indicating  
292 that a linear conversion between pixel intensity and modulus of elasticity could be used.

293

294 Repeating the same procedure using the LaminA/C + chromatin mesh and AFM data from intact  
295 nuclei exhibited a similar outcome. We again found that the two  $c$  values of 0.5 and 1.1  
296 produced a minimum value within our original 8 X 8 grid (green dotted boxes). For the first  
297 minimum value, a 10 X 10 surface centered on  $b = 3.7 \times 10^{-7} \mu\text{N}/\mu\text{m}^2$  and  $c = 1.1$  was generated.  
298 For the second minimum, we created a surface centered on  $b = 1.9 \times 10^{-5} \mu\text{N}/\mu\text{m}^2$  and  $c = 0.5$ .  
299 Both surfaces showed a minimum error along a straight line for different  $b$  values (dotted red  
300 lines). Comparing these values to another 10 X 10 surface centered on  $b = 1 \times 10^{-7} \mu\text{N}/\mu\text{m}^2$  and  
301  $c = 1$  showed a similar pattern, indicating that a linear relationship between voxel intensity and  
302 material property is sufficient for LaminA/C nuclei. We then set  $c=1$  and used the Matlab  
303 algorithm “fmincon” optimization algorithm with a step tolerance of  $1 \times 10^{-9}$  to find the  $b$  values  
304 that minimized the root mean square error for three “training” nuclei (nuclei 1, 2 and 3) for both  
305 chromatin and LaminA/C groups. This step resulted in an optimized  $b$  value of  $6.3 \times 10^{-7} \mu\text{N}/\mu\text{m}^2$   
306 with an error of  $5.5 \times 10^{-5} \mu\text{N}/\mu\text{m}^2$  for chromatin. For LaminA/C, the  $b$  mean value was  $8.64 \times 10^{-7}$   
307  $\mu\text{N}/\mu\text{m}^2$  with an error of  $3.1 \times 10^{-4} \mu\text{N}/\mu\text{m}^2$ .

308

### 309 Linear conversion model is distinct from a homogeneous model for chromatin

310 To test the differences between the homogeneous and linear-elastic heterogeneous models, the  
311 homogeneous chromatin models were made from the chromatin structures of nuclei #1 - #3 by

312 setting all the elements to same elastic modulus. The modulus value was determined via  
313 minimizing the RMSE between the load-displacement curves of the *in silico* and experimental  
314 AFM data of the LaminA/C depleted nuclei, producing a modulus of elasticity of  $2.7 \times 10^{-4}$   
315  $\mu\text{N}/\mu\text{m}^2$  with a RMSE value of  $6.2 \times 10^{-5} \mu\text{N}/\mu\text{m}^2$ . There was no statistical difference between the  
316 error of the homogeneous and linear-elastic heterogeneous models ( $p=.83$ ). Similarly, applying  
317 the error-minimized  $b$  values to homogenous and heterogeneous models generated from the  
318 test nuclei (#4 and #5) resulted in RMSE values of  $6.2 \times 10^{-5} \mu\text{N}/\mu\text{m}^2$  and  $5.5 \times 10^{-5} \mu\text{N}/\mu\text{m}^2$  with  
319 similar error values ( $p=.63$ ), suggesting that the bulk nuclei response can be modeled using  
320 either homogenous or heterogeneous models (**Table 1**).

321

322 Next, the *in silico* cross-sectional Von Mises stress during the  $1 \mu\text{m}$  indentation of the tip was  
323 compared between the homogeneous and heterogeneous chromatin models of nuclei #4 and  
324 #5. To compare the average Von Mises stresses between heterogeneous and homogeneous  
325 model simulations, average Von Mises stresses at mid-sagittal planes were plotted and  
326 compared across a  $1 \mu\text{m}$  region of interest located between nuclear heights  $Z=5 \mu\text{m}$  and  $Z= 6$   
327  $\mu\text{m}$ . The von mises stresses from each element within the models of each group were plotted  
328 and statistically compared between the two groups.

329

330 The heterogeneous models of nuclei #4 (top) and #5 (bottom) showed higher peaks at the  
331 nuclear periphery of the region of interest (**Fig. 7b**). Quantification of the peripheral peak  
332 stresses showed 16% greater stresses in the heterogeneous model when compared to the  
333 homogenous model ( $p<0.001$ ). The heterogeneous model also showed more efficient load  
334 carrying as shown by lower peak stresses that were distributed among more elements when  
335 compared to the homogenous model where a smaller number of elements had to carry greater  
336 loads (**Fig. 7c**).

337

## 338 Discussion

339 Deformation of the nucleus regulates gene transcription via altering both DNA confirmation<sup>22</sup>  
340 and the nuclear entry of transcription factors such as YAP/TAZ<sup>23</sup>. Nuclear deformation in  
341 response to mechanical forces is modulated by the mechanical stiffness provided by chromatin  
342 and LaminA/C within the nucleus<sup>13</sup>. The computational framework developed here was able to  
343 capture geometrical and structural inhomogeneities of both LaminA/C and chromatin from  
344 confocal images. Using constants derived from the calibration of AFM voxel-intensities to elastic  
345 moduli, mechanical behavior of nuclei were predicted merely from images without performing a  
346 physical mechanical test. The inherent limitation of this approach is that prior to predicting  
347 nuclear mechanical properties, a relatively large sample of AFM and confocal images is  
348 necessary. Further, while it was outside of the scope of the current study, errors associated with  
349 experiment-to-experiment variability of confocal images will need to be evaluated in future  
350 studies. Finally, for these predictions to be accurate, the nucleus has to be isolated from the cell  
351 as the cytoskeletal contribution to mechanical properties obtained from AFM cannot be avoided  
352 in intact cells. Even with these limitations, our method enables the prediction of nuclear stiffness  
353 and intra-nuclear deformation with only a simple nuclear isolation protocol and confocal  
354 imaging. The mechanical models of isolated, standalone nuclei developed here may also  
355 provide mechanistic insight into cellular mechanics and provide a basis for developing  
356 mechanical models of nuclei in intact cells in the future.

357

358 Our model provides a number of advantages over finite element analyses of the cell nucleus  
359 that tend to model the nucleus as a homogenous material with idealized geometry.<sup>24,25</sup> While  
360 comparisons between homogenous and heterogenous nuclear structures showed no significant  
361 changes in the “bulk” structural response under in silico AFM experiments, stresses throughout  
362 the nuclear structures were different where stresses concentrations were dependent upon the  
363 chromatin and LaminA/C distribution density obtained from the original images. As chromatin

364 condensation has been shown to change due to external nuclear loading<sup>26</sup>, these models may  
365 provide useful predictions of which regions of chromatin are experiencing larger loads.

366

367 Another potential advantage of this modeling system is the incorporation of nuclear envelope  
368 proteins into the generated models. In this study, we modeled LaminA/C as a heterogeneous  
369 material. Interestingly, the levels of LaminA/C within the nucleus have been shown to change  
370 under microgravity<sup>23</sup>. With our model it may be possible to predict the changes in nuclear  
371 stiffness due to alterations in LaminA/C levels. Further, the structural contributions of other  
372 nuclear envelope proteins such as nuclear pore complexes can also be incorporated into these  
373 models in the future, providing a robust computational framework for studying the forces on a  
374 number of nuclear proteins.

375

376 Previous research described the nucleus's mechanical elasticity as either linear elastic or  
377 hyperelastic<sup>20</sup>. During our experiments we chose to model the nucleus as linear elastic. As both  
378 homogenous and linear conversion models of nucleus #4 and #5 produced linear force-  
379 displacement curves, we also implemented hyperelastic Mooney-Rivlin and Neo-Hookean  
380 material definitions<sup>20</sup> which again produced linear force-displacement relationships (Fig. S2),  
381 suggesting that the shape of *in silico* loading curves were independent of the use of hyperelastic  
382 Mooney-Rivlin and Neo-Hookean models. Corroborating these *in silico* findings, as shown in  
383 Fig. S5, 38% of the AFM-tested nuclei showed linear loading curves.

384

385 In summary, we generated individual finite element models of nuclei from confocal images.  
386 Importantly, these models were tuned to match experimental AFM results, generating a similar  
387 bulk mechanical behavior when compared to a homogeneous nuclear structure. We also  
388 demonstrated that if a proper relation between chromatin stiffness and image intensity is found,  
389 our method can be used to model internal chromatin dynamics within the nucleus. Ultimately,

390 our study may lead to more effective techniques and insight into mechanobiological phenomena  
391 within the cell nucleus, elucidating cell nucleus plasticity in response to the application of  
392 mechanical forces.

393

#### 394 **Acknowledgements**

395 This study was supported by NASA ISGC NNX15AI04H, NIH R01AG059923, and  
396 5P2CHD086843-03, P20GM109095, P20GM103408 and NSF 1929188. We also greatly  
397 appreciate the AFM expertise from Dr. Paul Davis and the Surface Sciences Laboratory.

398

#### 399 **Table. 1:** Chromatin Material Optimization Data

|                              | Linear conversion                              | Homogeneous model                              |
|------------------------------|------------------------------------------------|------------------------------------------------|
| B factor/elasticity          | $6.3 \times 10^{-7} \mu\text{N}/\mu\text{m}^2$ | $2.8 \times 10^{-4} \mu\text{N}/\mu\text{m}^2$ |
| Average error of testing set | $5.5 \times 10^{-5} \mu\text{N}/\mu\text{m}^2$ | $6.2 \times 10^{-5} \mu\text{N}/\mu\text{m}^2$ |

400

#### 401 **Figure 1. siRNA mediated depletion of LaminA/C decreases isolated nuclei stiffness. a)**

402 Two groups of MSCs were grown in 10 % fetal bovine serum. One group received the LaminA/C  
403 specific siRNA treatment while the other group was treated with control siRNA. Nuclei were  
404 isolated and subsequently subjected to AFM testing. Nuclei of both the control group (n=30)  
405 and the laminA/C knockdown group (n=73) were indented by 1  $\mu\text{m}$  using a spherical tip with a  
406 diameter of 6  $\mu\text{m}$ . b) Confocal microscopy images of a nucleus stained for chromatin (Hoechst  
407 33342) and laminA/C (cell signaling mAB4777). c) Average ( $\pm$  SD) force-displacement curves  
408 for control nuclei (red) and laminA/C siRNA nuclei (blue). The average force-displacement curve  
409 for each group is shown as a solid line; less than one standard deviation is shown as shaded  
410 area. The purple area represents the overlap of the red and blue areas.

411



412 **Figure 2. Generation of image-based nucleus model.** a) Images of MSC nuclei were  
413 manually segmented using Amira to isolate the nuclear geometry. b) Segmented images were  
414 then used to create a surface mesh of the nucleus geometry. c) The surface image was  
415 converted into a volumetric mesh. d) The volumetric mesh was assigned material properties  
416 using the voxel intensity of the original image and the shown equation. e) Image of simulated  
417 atomic force microscopy (AFM) experiment with the AFM tip shown in yellow, the  
418 heterogeneous nucleus in blue, and the encastered base nodes in red. f) Cross sectional  
419 images of the nucleus model before compression (left) and after compression (right).

420

421 **Figure 3. Element size sensitivity analysis.** a) Cross sectional images of nuclei models  
422 created with elements that have an average element size of of 5, 4, 3, 2, 1, .8, and .6  $\mu\text{m}^3$ .  
423 Material parameters were set to  $b=20$  kPa and  $c=1$ . Color maps indicate the corresponding  
424 stiffness values. b) Graph of how maximum force, measured at the AFM tip pressing onto the  
425 nucleus, versus the element size averaged for three nuclei. The solid line represents the mean  
426 and the shaded area indicates the area within one standard deviation. Element sizes smaller  
427 than 1  $\mu\text{m}^3$  did not affect maximum force and standard deviation (green dashed line).

428

429 **Figure 4. Element size error analysis.** Representative sagittal plane images with element  
430 volumes of 3, 2, 1.5, 0.8, 0.6, and 0.3  $\mu\text{m}^3$  (2<sup>nd</sup> row) were compared against the matching  
431 location in the original confocal image (3<sup>rd</sup> row). Quantification of the pixel-by-pixel intensity  
432 values were represented by a % change heat map (4<sup>th</sup> row). Average % error in 3 and 0.3  $\mu\text{m}^3$   
433 element volumes were 12.3% and 4.3%, respectively.

434

435 **Figure 5. Optimization of LaminA/C knockdown nuclei shows a linear elasticity**  
436 **relationship.** a) Error surfaces for 3 LaminA/C depleted nuclei showed a rut-like error when

437 using different b and c values. b) Higher resolution error surfaces were generated around the  
438 lowest points of the original surface. These error surfaces produced minimum values on the  
439 order of  $10^{-4}$ , similar to the error surface generated around  $c=1$ , demonstrating that there is a  
440 correlation between b and c.

441

442 **Figure 6. Optimization data for control nuclei using linear and exponential conversion**

443 **factors.** a) Error surfaces for 3 control nuclei show a rut like error when using different b and c  
444 values. b) Higher resolution error surfaces were then done around the lowest points of the  
445 original surface, these error surfaces produces minimum values around  $10^{-4}$  similar to the error  
446 surface generated around  $c=1$  showing that there is a correlation between b and c.

447

448 **Figure 7. Linear conversion vs homogeneous model for chromatin.** a) The simulated force

449 curves were superimposed onto the LaminA/C KO results, comparing the resulting force curves  
450 from the linear conversion (left) to the results of the homogeneous model (right). b) Cross-  
451 sections of the model when fully compressed were imaged (left) and the average stresses within  
452 a  $1\ \mu\text{m}$  tall region beginning at a height of  $Z=5\ \mu\text{m}$  were plotted (middle). Stresses within the  
453 outer 25 percentile of both nuclei were plotted with a bar plot (right), showing the difference  
454 between the stress distributions within the homogeneous and heterogeneous models. c) Von  
455 Mises stress data was collected from the elements of both models at maximum AFM tip  
456 compression and plotted within a histogram to show the difference between the stresses  
457 developed within the homogeneous and heterogeneous models.

458

459 **Figure S1. Image Noise.** 5 confocal images of chromatin from nucleus 1 were separated and a

460 homogeneous section of the image was then selected from each image. This section was used  
461 to quantify the image noise within the microscope by finding the average voxel intensity within  
462 the images and comparing this value to the voxels within each area. The error between the

463 average voxel intensity and the accompanying area voxels was averaged to produce an  
464 average error of each area. This data was averaged to produce the average noise within the  
465 chromatin image of nucleus 1.

466

467 **Figure S2. Material elasticity comparison.** Nuclei simulations of nucleus 4 and 5 were  
468 attempted using linear isotropic model that used the optimized values for the homogeneous  
469 image conversion (left). Mooney-Rivlin models were then created by converting the  
470 homogeneous optimized elasticity to Mooney-Rivlin constants as indicated within previous  
471 research<sup>15</sup> by where  $c_{01}$  was set to 0 and  $c_{10}$  was formed by dividing the linear isotropic  
472 elasticity by 6 (middle). From this point, 5 nuclei were formed by creating a Neo-Hookean  
473 material model by dividing the homogeneous optimized elasticity by 6 to form the Neo Hookean  
474 material constants as explained within the Abaqus user manual.

475

476 **Figure S3. Chromatin material models.** Finite element models of the nucleus have been  
477 defined with the chromatin images using both the homogeneous conversion factors and the  
478 heterogeneous conversion factors with a cross section of the nucleus models defined with the  
479 heterogeneous model shown on the left and cross sections of the homogeneous models shown  
480 on the right showing the material values using a color scale shown on the far right.

481

482 **Figure S4. Heterogeneous vs Homogeneous stress distribution.** Nuclei models 1-5 were  
483 created with optimized heterogeneous and homogeneous conversion factors. The nucleus  
484 models then underwent a simulated atomic force microscopy experiment with nucleus cross  
485 sections for the heterogeneous nuclei showing stress dispersions dependent on the chromatin  
486 density within the original images (left) as well as homogeneous models showing a stress  
487 dispersion not dependent on the original chromatin density (right).

488

489 **Figure S5. Atomic Force Microscopy Curves** Atomic force microscopy experiment data for  
490 laminA/C knockdown nuclei (n=72, left) and control nuclei (n=30, right) has been plotted using  
491 Matlab.

492

493

#### 494 **References**

495

- 496 1 Pagnotti, G. M. *et al.* Combating osteoporosis and obesity with exercise: leveraging cell  
497 mechanosensitivity. *Nature Reviews Endocrinology*, doi:10.1038/s41574-019-0170-1  
498 (2019).
- 499 2 Engler, A. J., Sen, S., Sweeney, H. L. & Discher, D. E. Matrix elasticity directs stem cell  
500 lineage specification. *Cell* **126**, 677-689, doi:10.1016/j.cell.2006.06.044 (2006).
- 501 3 Hanna, H., Mir, L. M. & Andre, F. M. In vitro osteoblastic differentiation of mesenchymal  
502 stem cells generates cell layers with distinct properties. *Stem Cell Res Ther* **9**, 203,  
503 doi:10.1186/s13287-018-0942-x (2018).
- 504 4 Humphrey, J. D., Dufresne, E. R. & Schwartz, M. A. Mechanotransduction and  
505 extracellular matrix homeostasis. *Nature reviews. Molecular cell biology* **15**, 802-812,  
506 doi:10.1038/nrm3896 (2014).
- 507 5 Andalib, M. N., Lee, J. S., Ha, L., Dzenis, Y. & Lim, J. Y. Focal adhesion kinase  
508 regulation in stem cell alignment and spreading on nanofibers. *Biochemical and*  
509 *biophysical research communications* **473**, 920-925, doi:10.1016/j.bbrc.2016.03.151  
510 (2016).

- 511 6 Harris, A. R., Jreij, P. & Fletcher, D. A. Mechanotransduction by the Actin Cytoskeleton:  
512 Converting Mechanical Stimuli into Biochemical Signals. *Annual Review of Biophysics*  
513 **47**, 617-631, doi:10.1146/annurev-biophys-070816-033547 (2016).
- 514 7 Hoffman, L. M. *et al.* Mechanical stress triggers nuclear remodeling and the formation of  
515 Transmembrane Actin Nuclear lines with associated Nuclear Pore Complexes.  
516 *Molecular biology of the cell*, mbc.E19-01-0027, doi:10.1091/mbc.E19-01-0027 (2020).
- 517 8 Shiu, J.-Y., Aires, L., Lin, Z. & Vogel, V. Nanopillar force measurements reveal actin-  
518 cap-mediated YAP mechanotransduction. *Nature cell biology* **20**, 262-271,  
519 doi:10.1038/s41556-017-0030-y (2018).
- 520 9 Le, H. Q. *et al.* Mechanical regulation of transcription controls Polycomb-mediated gene  
521 silencing during lineage commitment. *Nature cell biology* **18**, 864-875,  
522 doi:10.1038/ncb3387 (2016).
- 523 10 Makhija, E., Jokhun, D. S. & Shivashankar, G. V. Nuclear deformability and telomere  
524 dynamics are regulated by cell geometric constraints. *Proceedings of the National*  
525 *Academy of Sciences of the United States of America* **113**, E32-40,  
526 doi:10.1073/pnas.1513189113 (2016).
- 527 11 Darling, E. M. & Di Carlo, D. High-Throughput Assessment of Cellular Mechanical  
528 Properties. *Annual review of biomedical engineering* **17**, 35-62, doi:10.1146/annurev-  
529 bioeng-071114-040545 (2015).
- 530 12 Ghosh, S. *et al.* Deformation Microscopy for Dynamic Intracellular and Intranuclear  
531 Mapping of Mechanics with High Spatiotemporal Resolution. *Cell reports* **27**, 1607-  
532 1620.e1604, doi:10.1016/j.celrep.2019.04.009 (2019).
- 533 13 Martins, R. P., Finan, J. D., Farshid, G. & Lee, D. A. Mechanical Regulation of Nuclear  
534 Structure and Function. *Annual review of biomedical engineering* **14**, 431-455,  
535 doi:10.1146/annurev-bioeng-071910-124638 (2012).

- 536 14 Lammerding, J. *et al.* Lamins A and C but Not Lamin B1 Regulate Nuclear Mechanics.  
537 *Journal of Biological Chemistry* **281**, 25768-25780, doi:10.1074/jbc.M513511200 (2006).
- 538 15 Stephens, A. D., Banigan, E. J. & Marko, J. F. Separate roles for chromatin and lamins  
539 in nuclear mechanics. *Nucleus (Austin, Tex.)* **9**, 119-124,  
540 doi:10.1080/19491034.2017.1414118 (2018).
- 541 16 Stephens, A. D. *et al.* Chromatin histone modifications and rigidity affect nuclear  
542 morphology independent of lamins. *Molecular biology of the cell* **29**, 220-233,  
543 doi:10.1091/mbc.E17-06-0410 (2018).
- 544 17 Peister, A. *et al.* Adult stem cells from bone marrow (MSCs) isolated from different  
545 strains of inbred mice vary in surface epitopes, rates of proliferation, and differentiation  
546 potential. *Blood* **103**, 1662-1668, doi:10.1182/blood-2003-09-3070 (2004).
- 547 18 Bas, G. *et al.* Low Intensity Vibrations Augment Mesenchymal Stem Cell Proliferation  
548 and Differentiation Capacity during in vitro Expansion. *Scientific reports* **10**, 9369,  
549 doi:10.1038/s41598-020-66055-0 (2020).
- 550 19 Sankaran, J. S. *et al.* Knockdown of formin mDia2 alters lamin B1 levels and increases  
551 osteogenesis in stem cells. *Stem Cells* **38**, 102-117, doi:10.1002/stem.3098 (2020).
- 552 20 Tang, G., Galluzzi, M., Zhang, B., Shen, Y. L. & Stadler, F. J. Biomechanical  
553 Heterogeneity of Living Cells: Comparison between Atomic Force Microscopy and Finite  
554 Element Simulation. *Langmuir : the ACS journal of surfaces and colloids* **35**, 7578-7587,  
555 doi:10.1021/acs.langmuir.8b02211 (2019).
- 556 21 Newberg, J. *et al.* Isolated Nuclei Stiffen in Response to Low Intensity Vibration. *Journal*  
557 *of biomechanics*, 110012, doi:<https://doi.org/10.1016/j.jbiomech.2020.110012> (2020).
- 558 22 Rubin, J., Styner, M. & Uzer, G. Physical Signals May Affect Mesenchymal Stem Cell  
559 Differentiation via Epigenetic Controls. *Exercise and sport sciences reviews* **46**, 42-47,  
560 doi:10.1249/jes.000000000000129 (2018).

- 561 23 Dupont, S. *et al.* Role of YAP/TAZ in mechanotransduction. *Nature* **474**, 179-183,  
562 doi:[http://www.nature.com/nature/journal/v474/n7350/abs/10.1038-nature10137-](http://www.nature.com/nature/journal/v474/n7350/abs/10.1038-nature10137-unlocked.html#supplementary-information)  
563 [unlocked.html#supplementary-information](http://www.nature.com/nature/journal/v474/n7350/abs/10.1038-nature10137-unlocked.html#supplementary-information) (2011).
- 564 24 Wang, L., Wang, L., Xu, L. & Chen, W. Finite Element Modelling of Single Cell Based on  
565 Atomic Force Microscope Indentation Method. *Computational and Mathematical*  
566 *Methods in Medicine* **2019**, 7895061, doi:10.1155/2019/7895061 (2019).
- 567 25 McGarry, J. G. & Prendergast, P. J. A three-dimensional finite element model of an  
568 adherent eukaryotic cell. *European cells & materials* **7**, 27-33; discussion 33-24 (2004).
- 569 26 Heo, S. J. *et al.* Biophysical Regulation of Chromatin Architecture Instills a Mechanical  
570 Memory in Mesenchymal Stem Cells. *Scientific reports* **5**, 16895, doi:10.1038/srep16895  
571 (2015).
- 572
- 573

## Figure 1

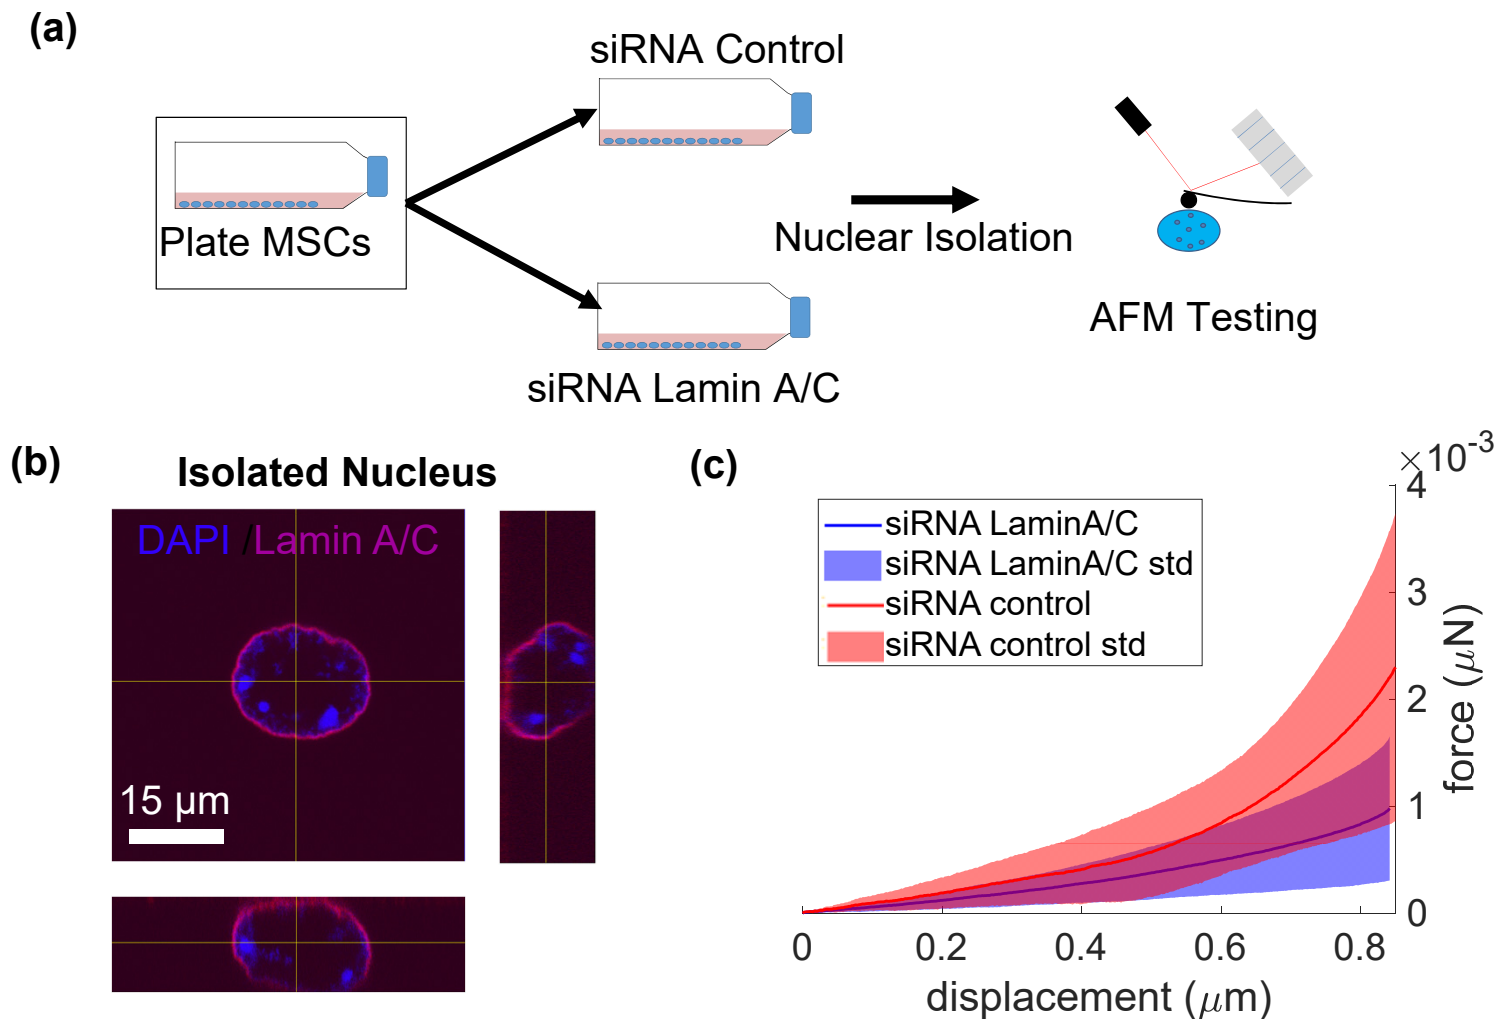

**Figure 1. siRNA mediated depletion of LaminA/C decreases isolated nuclei stiffness.** a) Two groups of MSCs were grown in 10 % fetal bovine serum. One group received the LaminA/C specific siRNA treatment while the other group was treated with control siRNA. Nuclei were isolated and subsequently subjected to AFM testing. Nuclei of both the control group (n=30) and the laminA/C knockdown group (n=73) were indented by 1  $\mu\text{m}$  using a spherical tip with a diameter of 6  $\mu\text{m}$ . b) Confocal microscopy images of a nucleus stained for chromatin (Hoechst 33342) and laminA/C (cell signaling mAB4777). c) Average ( $\pm$  SD) force-displacement curves for control nuclei (red) and laminA/C siRNA nuclei (blue). The average force-displacement curve for each group is shown as a solid line; less than one standard deviation is shown as shaded area. The purple area represents the overlap of the red and blue areas.



## Figure 2

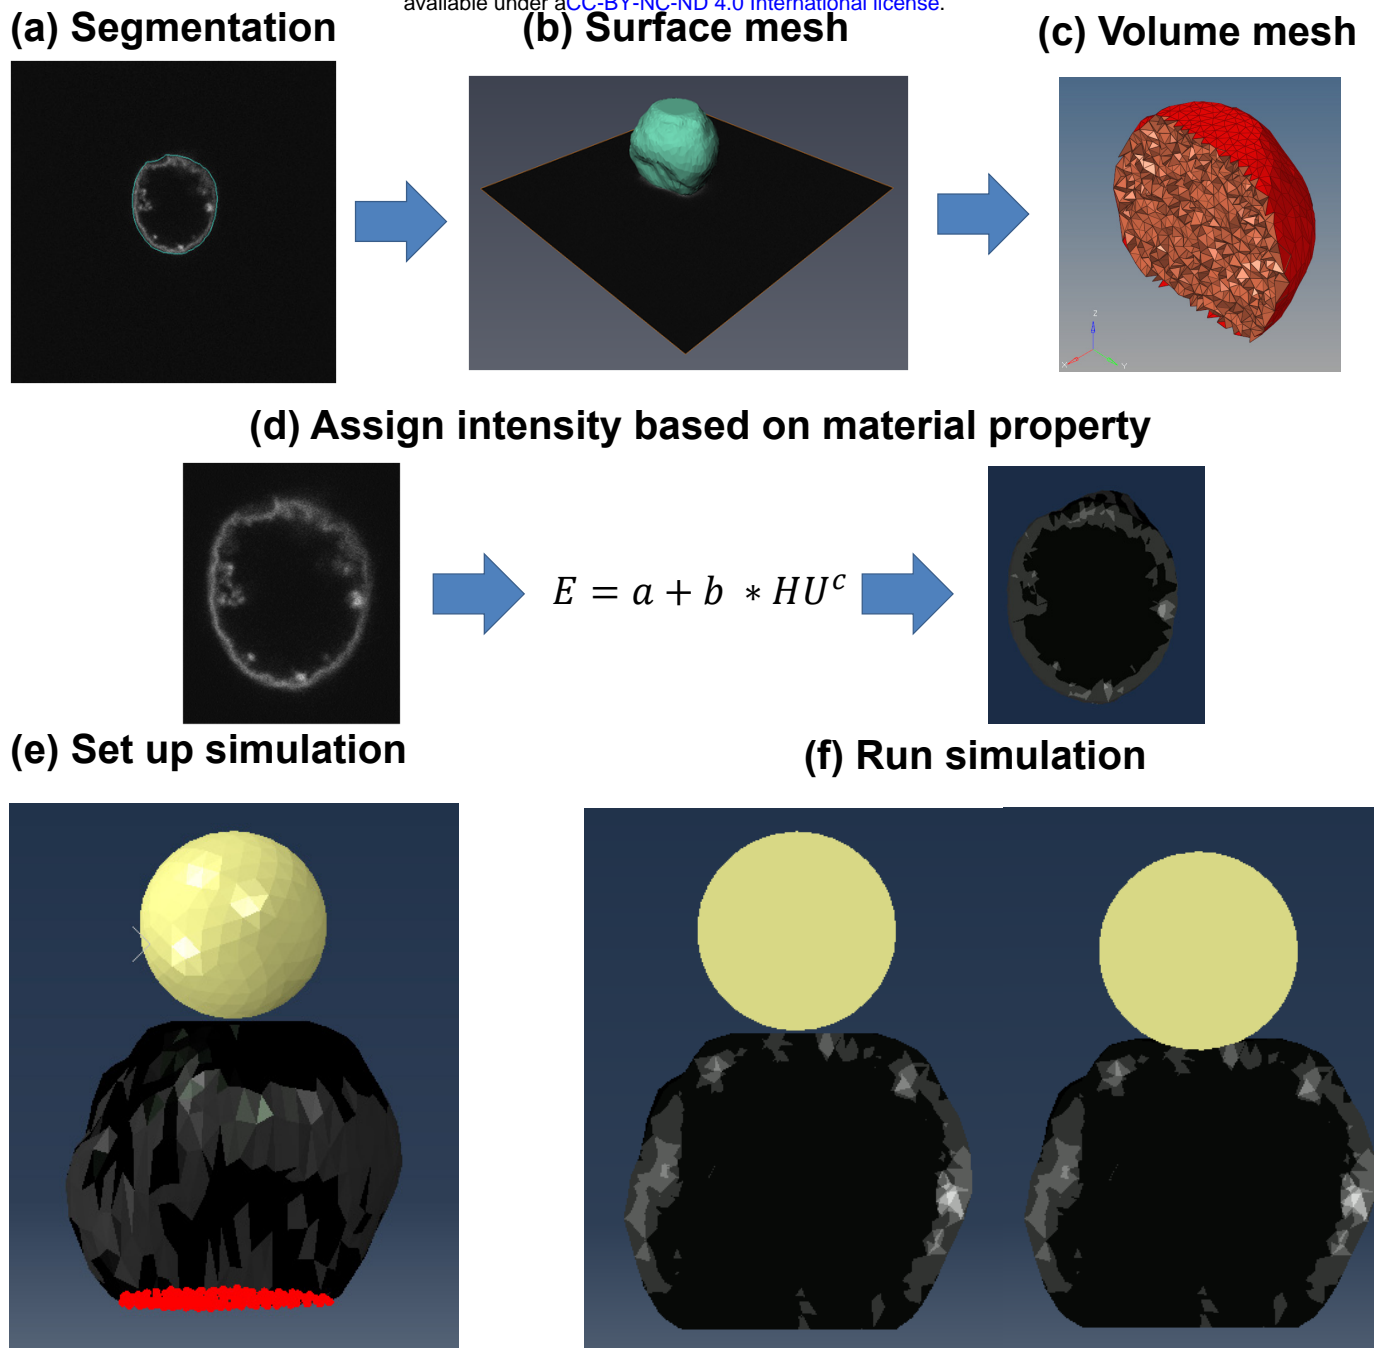

**Figure 2. Generation of image-based nucleus model.** a) Images of MSC nuclei were manually segmented using Amira to isolate the nuclear geometry. b) Segmented images were then used to create a surface mesh of the nucleus geometry. c) The surface image was converted into a volumetric mesh. d) The volumetric mesh was assigned material properties using the voxel intensity of the original image and the shown equation. e) Image of simulated atomic force microscopy (AFM) experiment with the AFM tip shown in yellow, the heterogeneous nucleus in blue, and the encastered base nodes in red. f) Cross sectional images of the nucleus model before compression (left) and after compression (right).

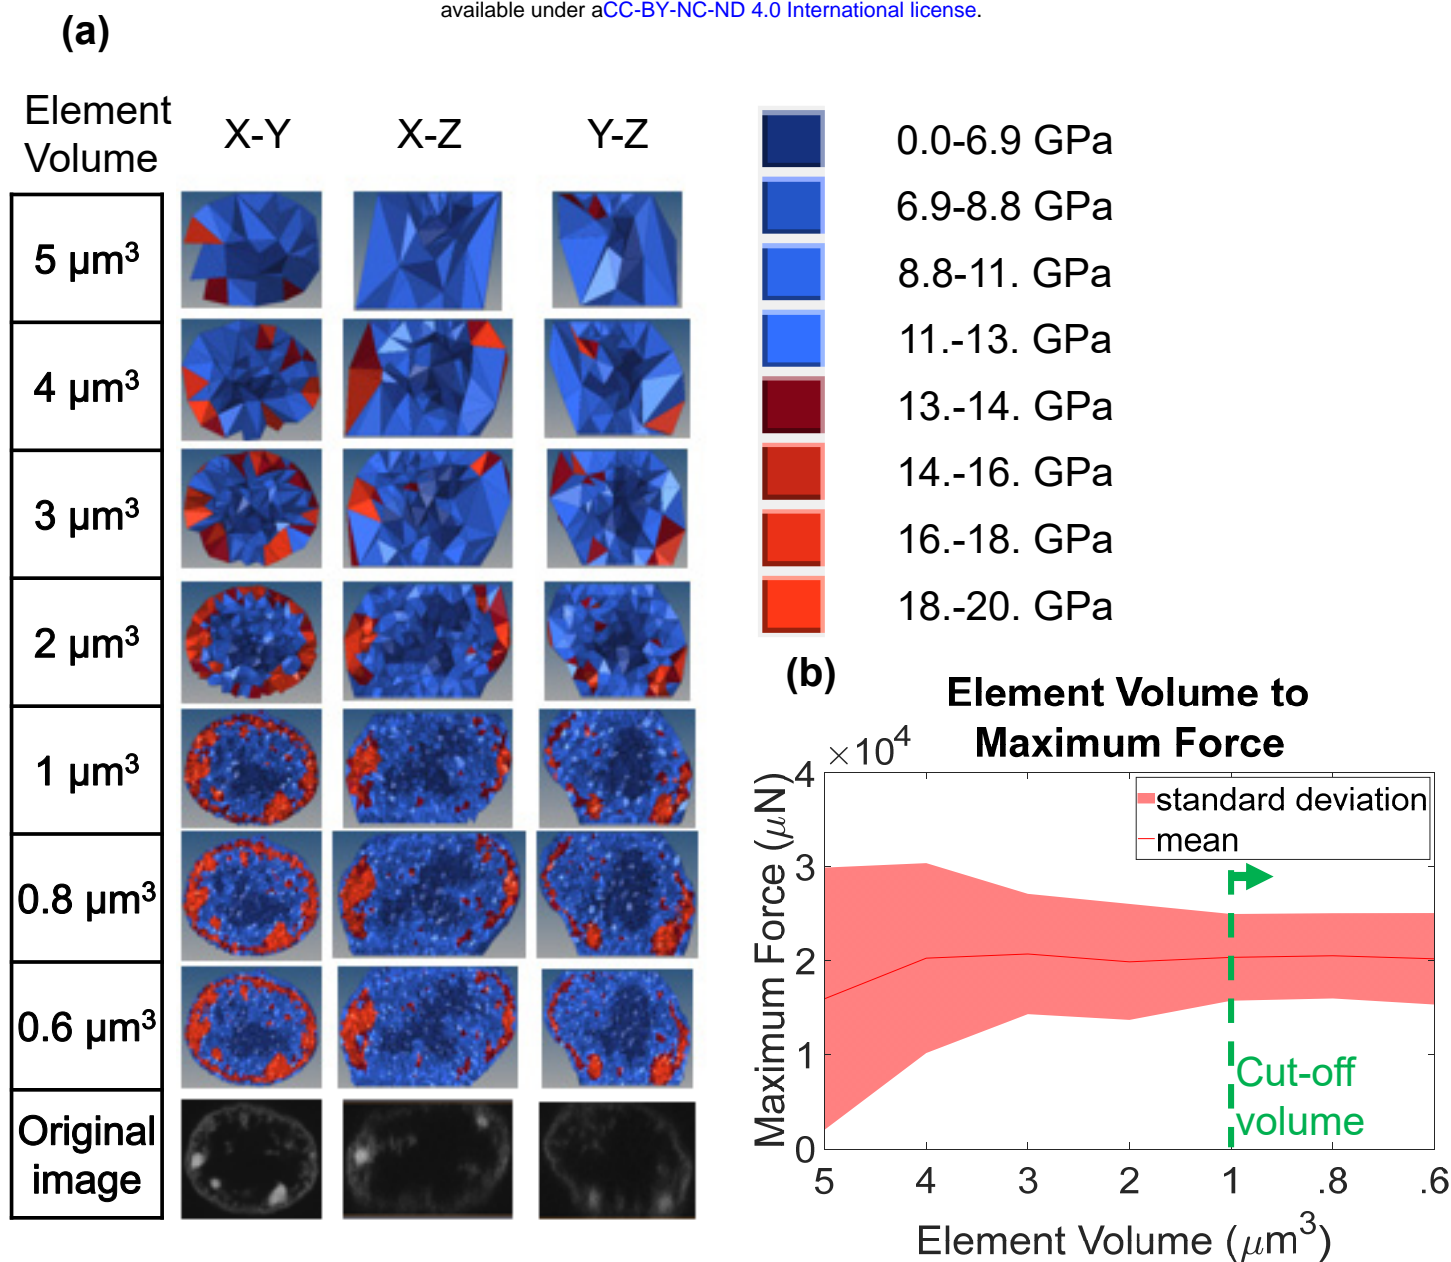

**Figure 3. Element size sensitivity analysis.** a) Cross sectional images of nuclei models created with elements that have an average element size of of 5, 4, 3, 2, 1, .8, and .6  $\mu\text{m}^3$ . Material parameters were set to  $b=20$  kPa and  $c=1$ . Color maps indicate the corresponding stiffness values. b) Graph of how maximum force, measured at the AFM tip pressing onto the nucleus, versus the element size averaged for three nuclei. The solid line represents the mean and the shaded area indicates the area within one standard deviation. Element sizes smaller than 1  $\mu\text{m}^3$  did not affect maximum force and standard deviation (green dashed line).

**Figure 4**

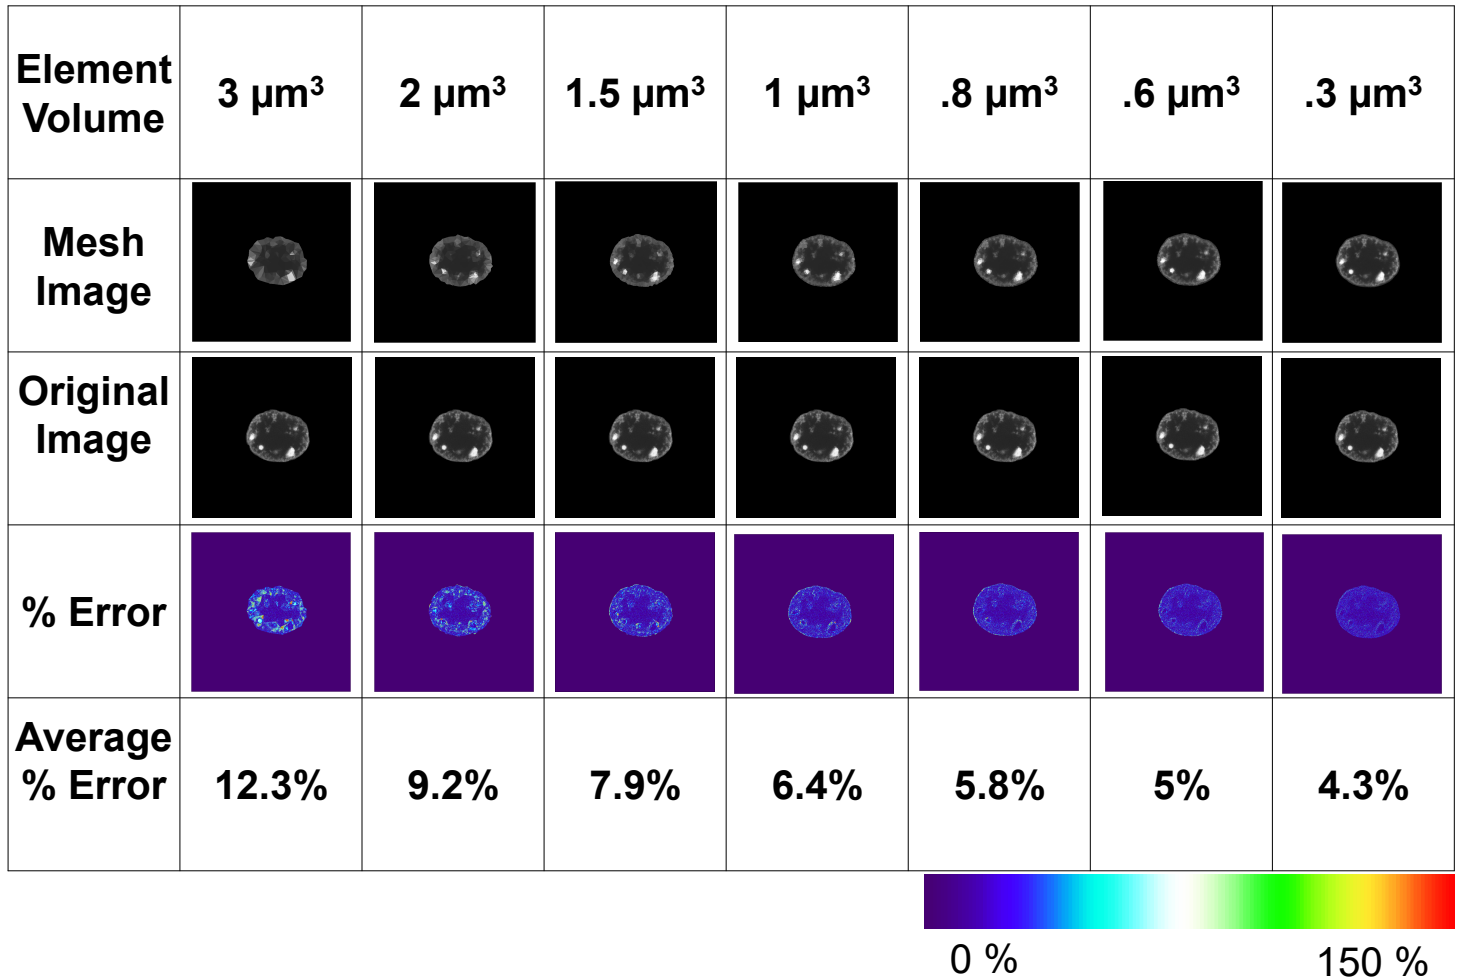

**Figure 4. Element size error analysis.** Representative sagittal plane images with element volumes of 3, 2, 1.5, 0.8, 0.6, and 0.3  $\mu\text{m}^3$  (2<sup>nd</sup> row) were compared against the matching location in the original confocal image (3<sup>rd</sup> row). Quantification of the pixel-by-pixel intensity values were represented by a % change heat map (4<sup>th</sup> row). Average % error in 3 and 0.3  $\mu\text{m}^3$  element volumes were 12.3% and 4.3%, respectively.

## Figure 5

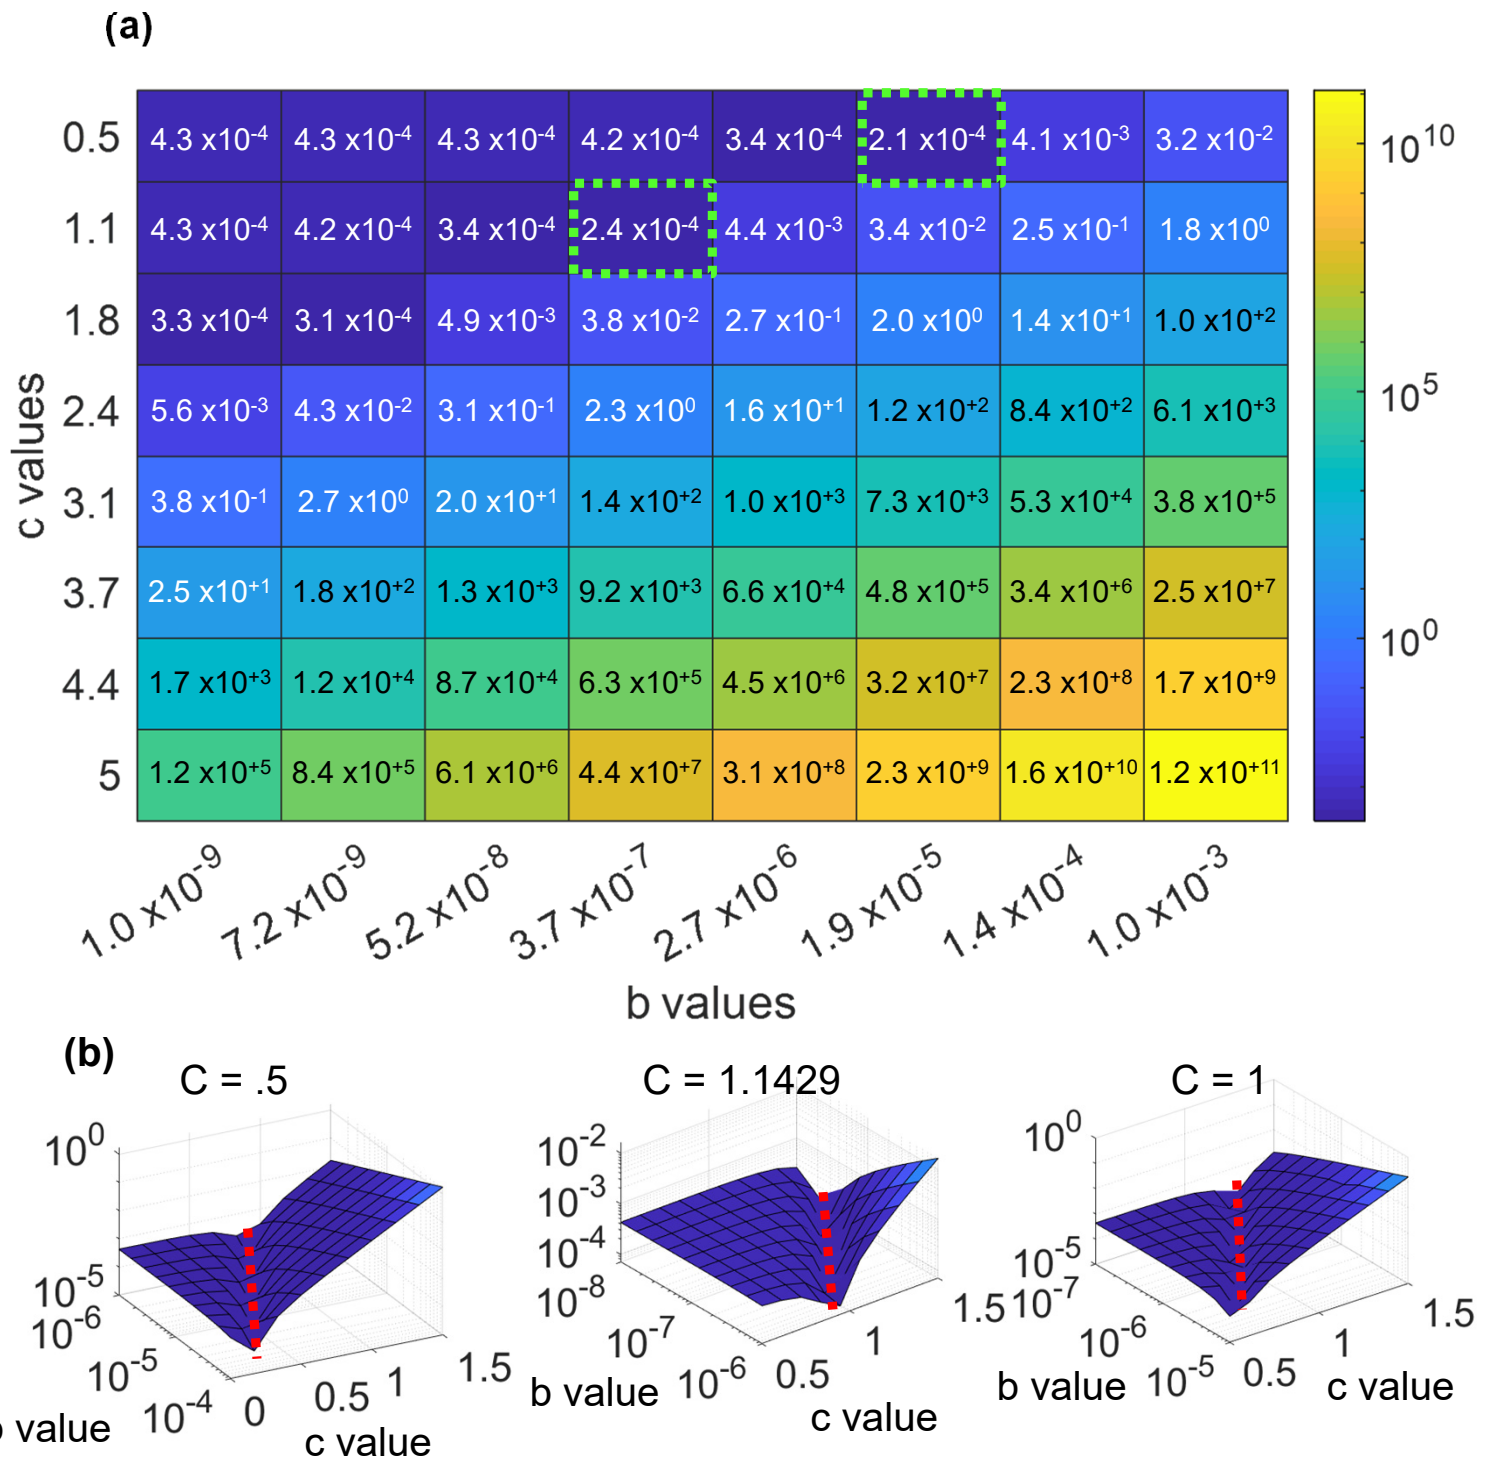

**Figure 5. Optimization of LaminA/C knockdown nuclei shows a linear elasticity relationship.** a) Error surfaces for 3 LaminA/C depleted nuclei showed a rut-like error when using different b and c values. b) Higher resolution error surfaces were generated around the lowest points of the original surface. These error surfaces produced minimum values on the order of  $10^{-4}$ , similar to the error surface generated around  $c=1$ , demonstrating that there is a correlation between b and c.

## Figure 6

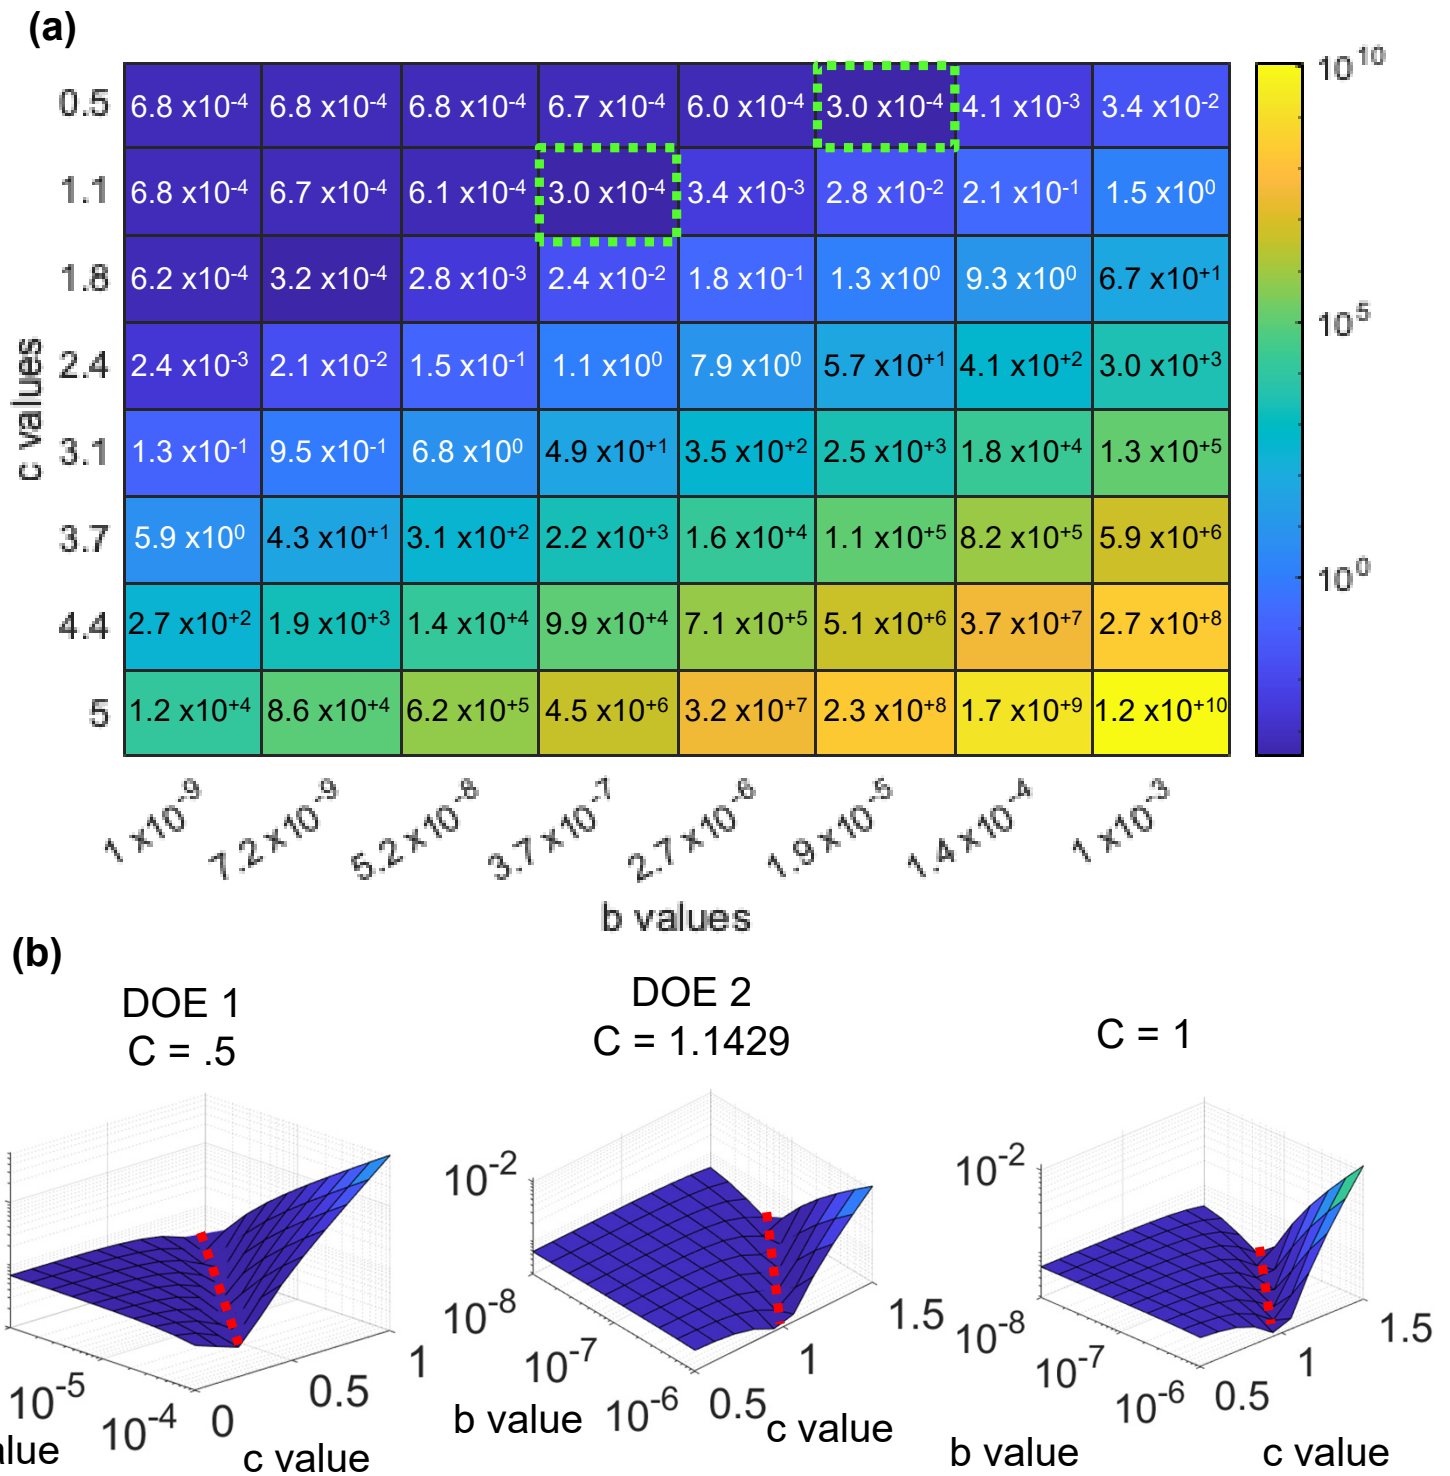

**Figure 6. Optimization data for control nuclei knockdown using linear and exponential conversion factors.** a) Error surfaces for 3 control nuclei showed a rut like error when using different b and c values. b) Higher resolution error surfaces were generated around the lowest points of the original surface. These error surfaces produced minimum values on the order of  $10^{-4}$ , similar to the error surface generated around  $c=1$ , demonstrating that there is a correlation between b and c.

**Figure 7**

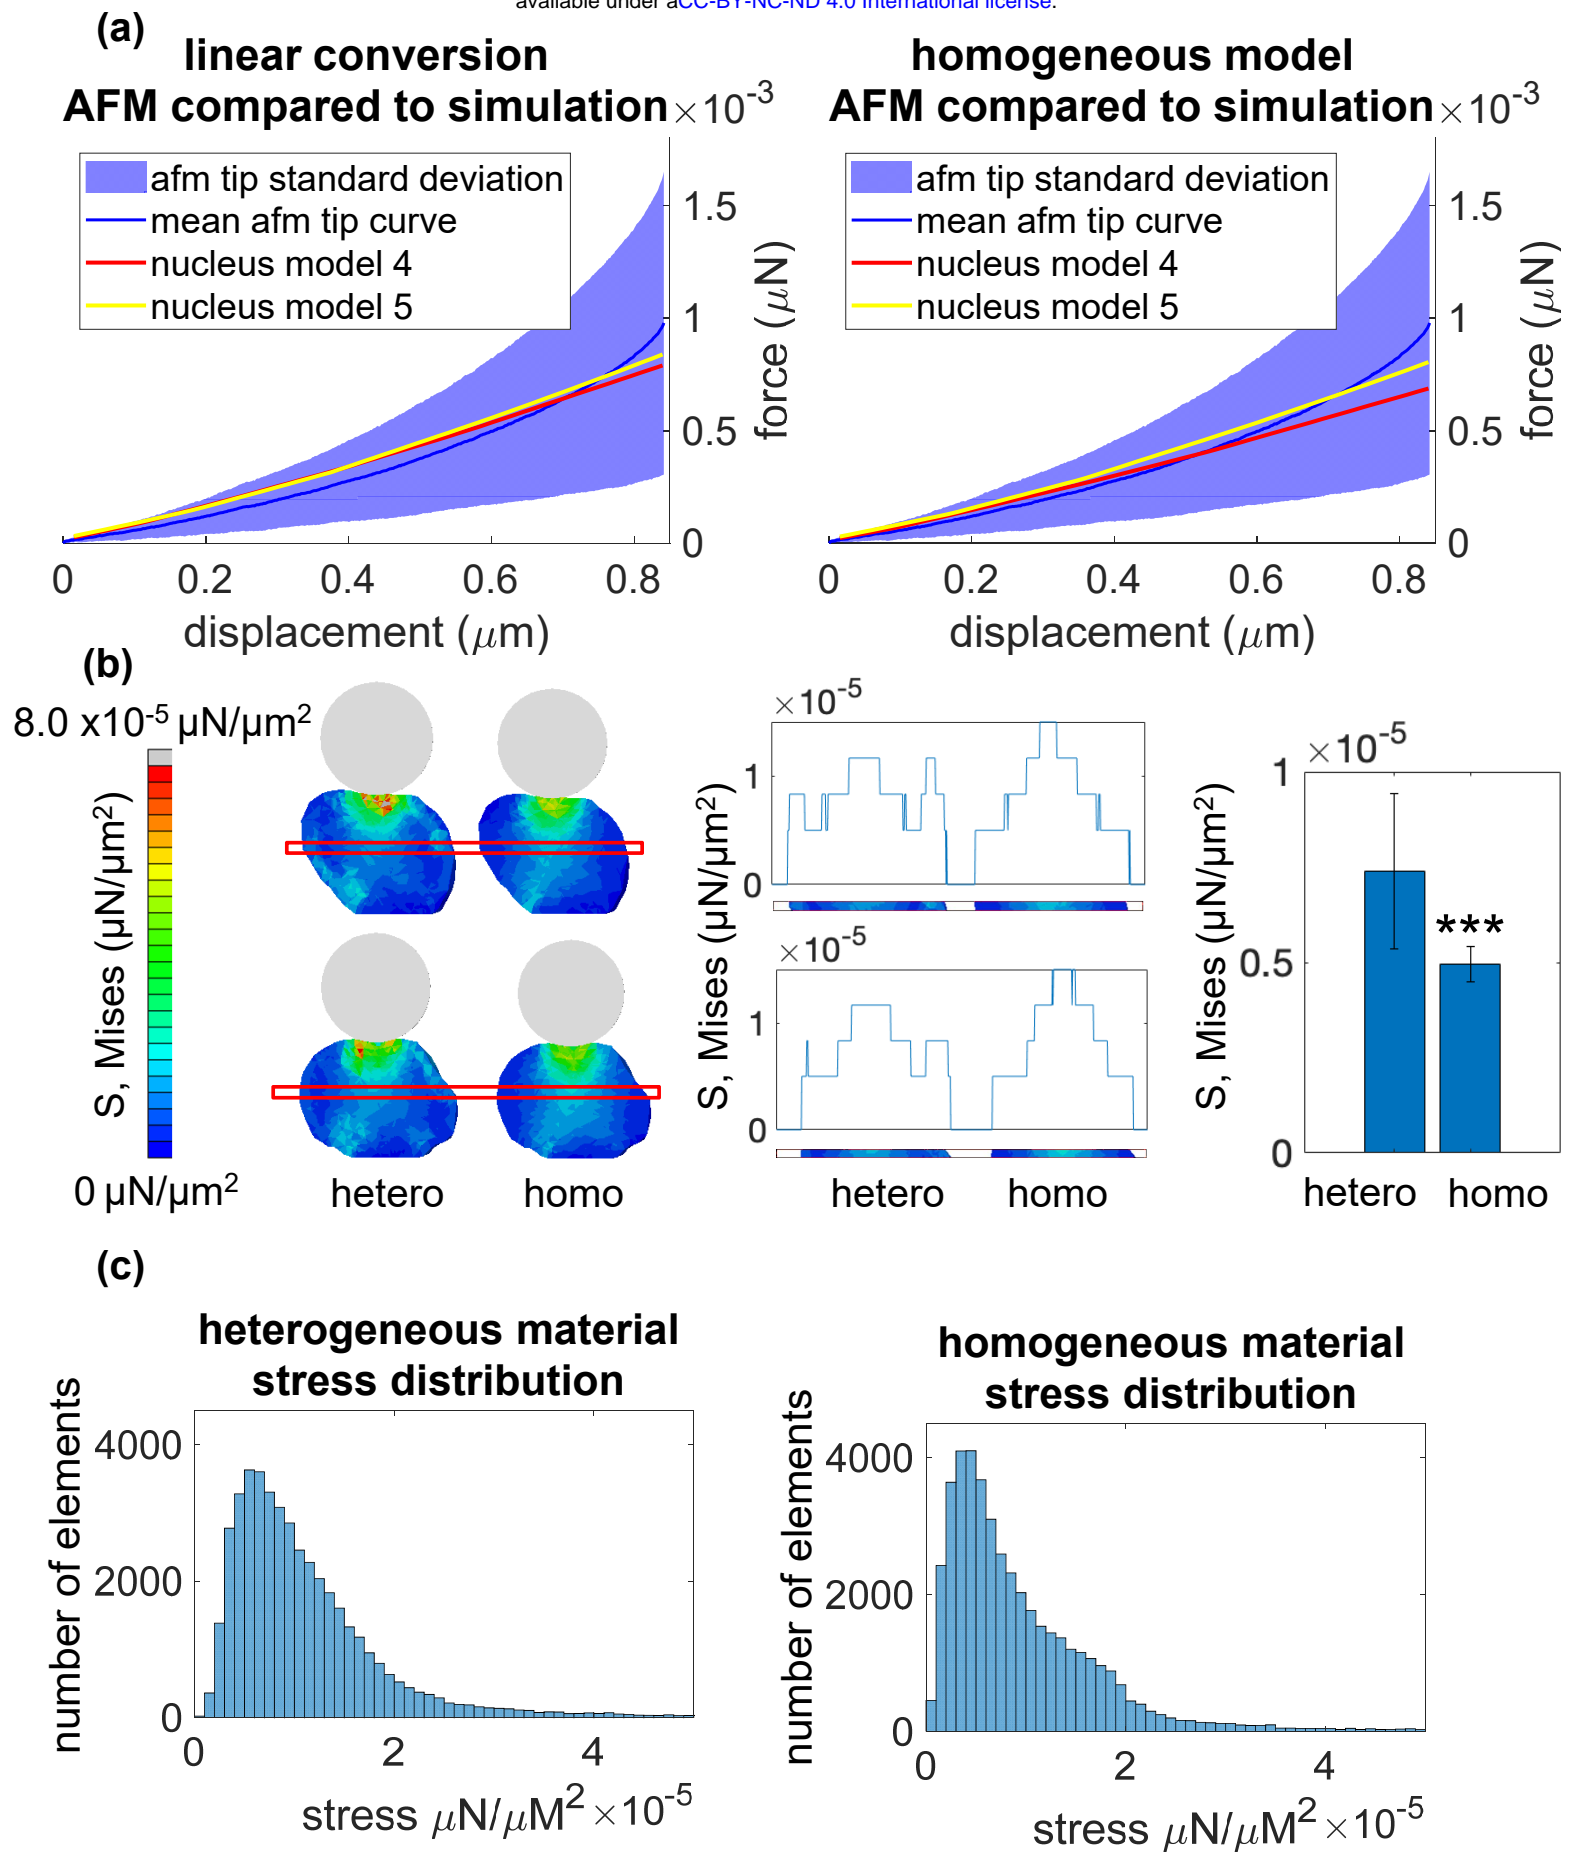

**Figure 7. Linear conversion vs homogeneous model for chromatin.** a) The simulated force curves were superimposed onto the LaminA/C KO results, comparing the resulting force curves from the linear conversion (left) to the results of the homogeneous model (right). b) Cross-sections of the model when fully compressed were imaged (left) and the average stresses within a 1  $\mu\text{m}$  tall region beginning at a height of  $Z=5 \mu\text{m}$  were plotted (middle). Stresses within the outer 25 percentile of both nuclei were plotted with a bar plot (right), showing the difference between the stress distributions within the homogeneous and heterogeneous models. c) Von Mises stress data was collected from the elements of both models at maximum AFM tip compression and plotted within a histogram to show the difference between the stresses developed within the homogeneous and heterogeneous models.

# Supplementary Information

## Modeling stem cell nucleus mechanics using confocal microscopy

Kennedy Z<sup>1</sup>, Newberg J<sup>1</sup>, Goelzer M<sup>1</sup>, Stefan Judex<sup>2</sup>, Fitzpatrick CK<sup>1</sup>, Uzer G<sup>1</sup> †

<sup>1</sup>Mechanical and Biomedical Engineering, Boise State University

<sup>2</sup>Biomedical Engineering, Stony Brook University

† **Corresponding Author**

### Funding support:

NASA ISGC NNX15AI04H, NIH R01AG059923, and 5P2CHD086843-03, P20GM109095, P20GM103408 and NSF 1929188.



## Supplementary Figure 1

### Image noise data

|                        | 1 <sup>st</sup> area                                                              | 2 <sup>nd</sup> area                                                              | 3 <sup>rd</sup> area                                                               | 4 <sup>th</sup> area                                                                | 5 <sup>th</sup> area                                                                |
|------------------------|-----------------------------------------------------------------------------------|-----------------------------------------------------------------------------------|------------------------------------------------------------------------------------|-------------------------------------------------------------------------------------|-------------------------------------------------------------------------------------|
| Image of area selected | 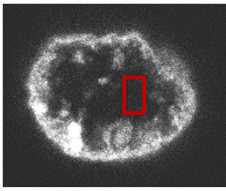 |  |  |  |  |
| Area average error     | 14.0%                                                                             | 13.0%                                                                             | 13.0%                                                                              | 12.0%                                                                               | 13.0%                                                                               |
| Total average error    | 13.0%                                                                             |                                                                                   |                                                                                    |                                                                                     |                                                                                     |

**Figure S1. Image Noise.** 5 confocal images of chromatin from nucleus 1 were separated and a homogeneous section of the image was then selected from each image. This section was used to quantify the image noise within the microscope by finding the average voxel intensity within the images and comparing this value to the voxels within each area. The error between the average voxel intensity and the accompanying area voxels was averaged to produce an average error of each area. This data was averaged to produce the average noise within the chromatin image of nucleus 1.

## Supplementary Figure 2

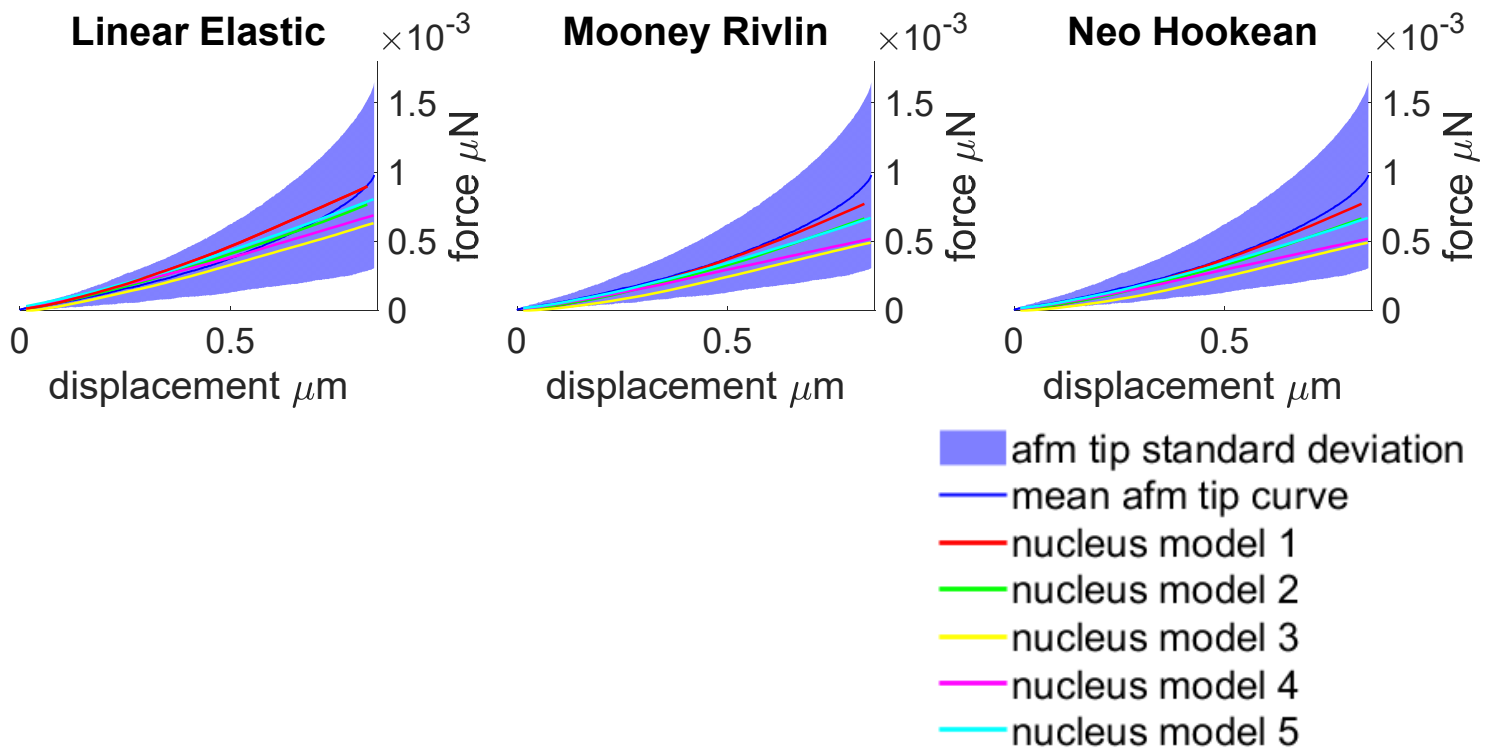

**Figure S2. material elasticity comparison.** Nuclei simulations of nucleus 4 and 5 were attempted using linear isotropic model that used the optimized values for the homogeneous image conversion(left). Mooney-Rivlin models were then created by converting the homogeneous optimized elasticity to Mooney-Rivlin constants as indicated within previous research<sup>15</sup> by where  $c_{01}$  was set to 0 and  $c_{10}$  was formed by dividing the linear isotropic elasticity by 6(middle). From this point, 5 nuclei were formed by creating a Neo-Hookean material model by dividing the homogeneous optimized elasticity by 6 to form the Neo Hookean material constants as explained within the Abaqus user manual.

Supplementary Figure 3

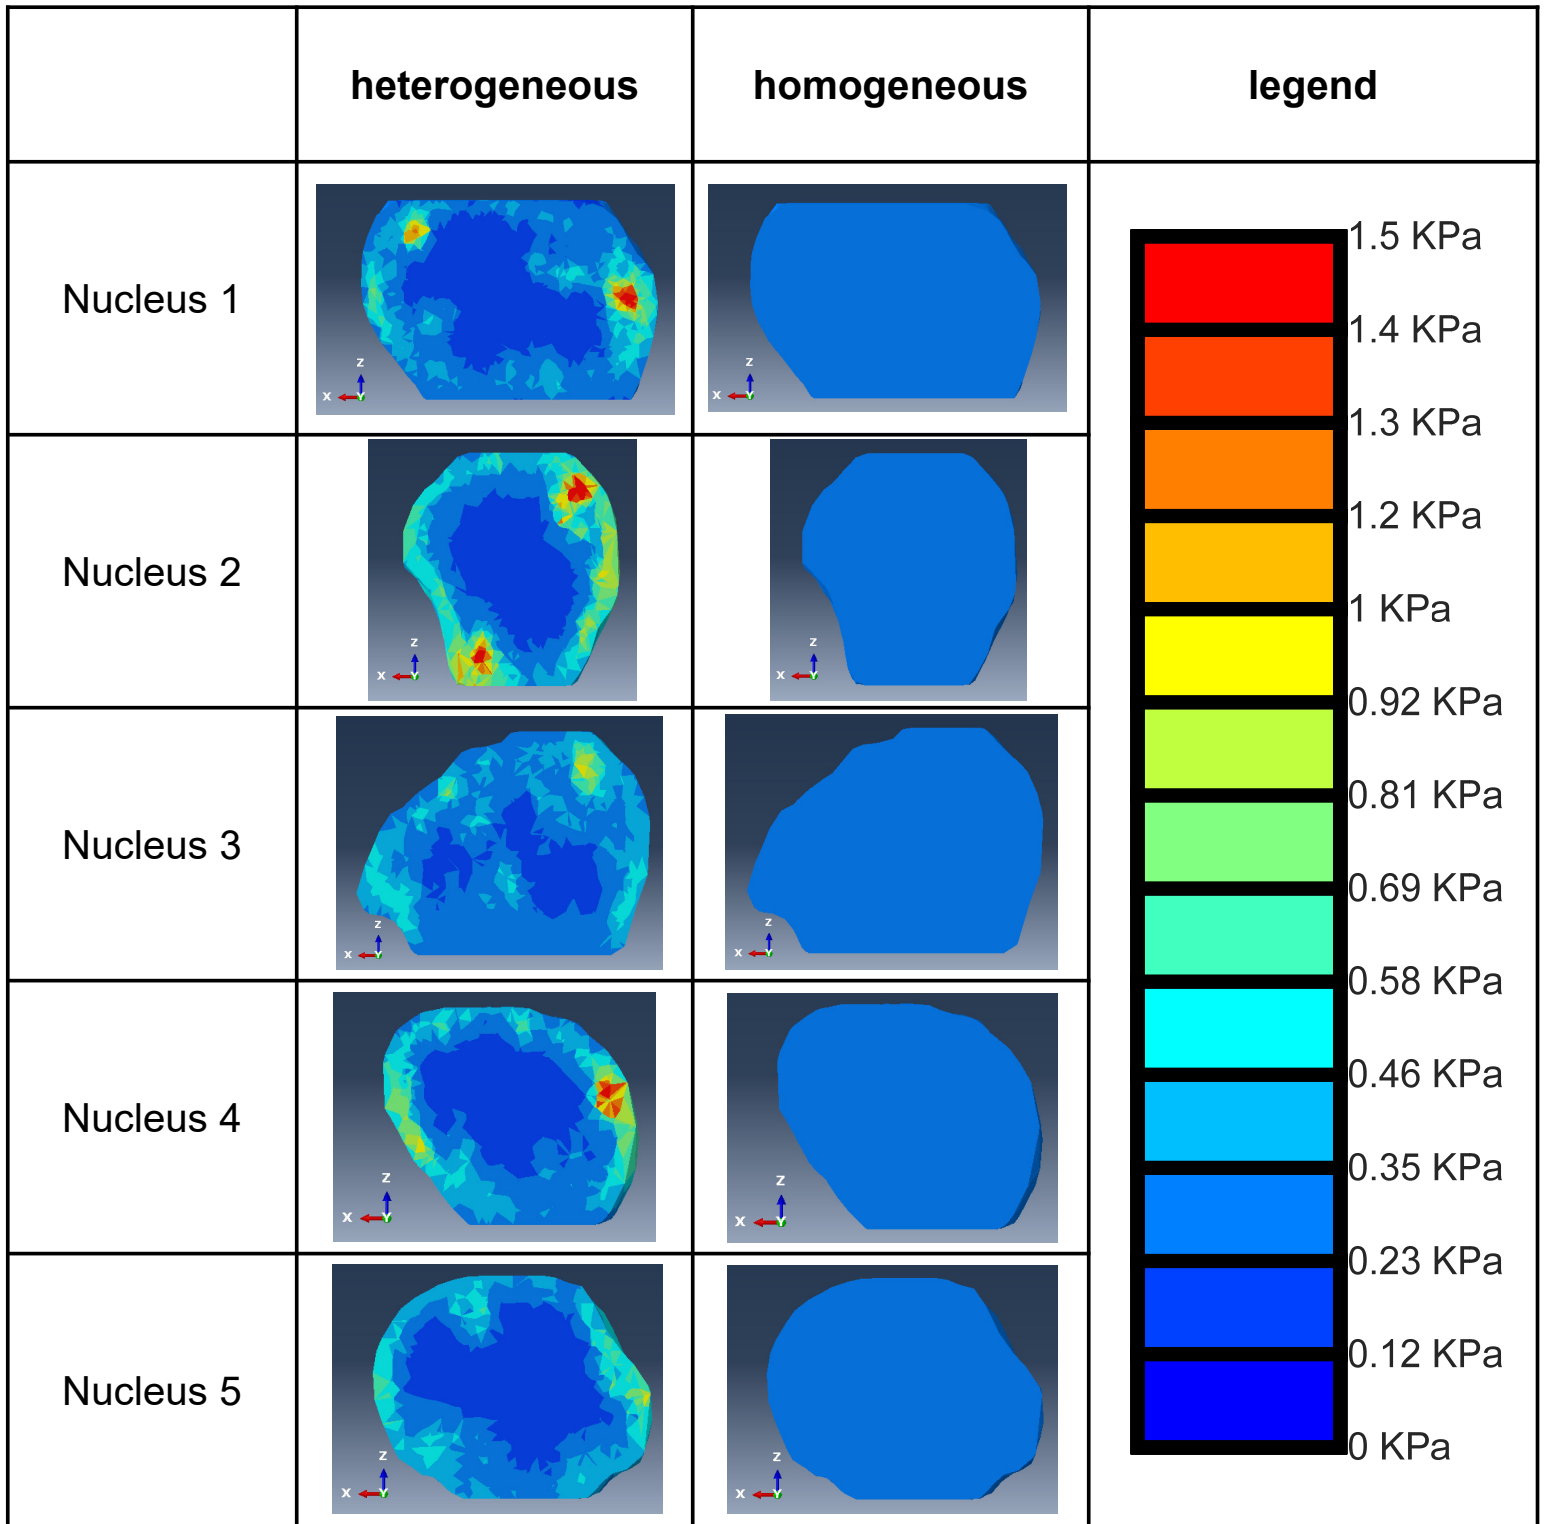

**Figure S3. Chromatin material models** Finite element models of the nucleus have been defined with the chromatin images using both the homogeneous conversion factors and the heterogeneous conversion factors with a cross section of the nucleus models defined with the heterogeneous model shown on the left and cross sections of the homogeneous models shown on the right showing the material values using a color scale shown on the far right.

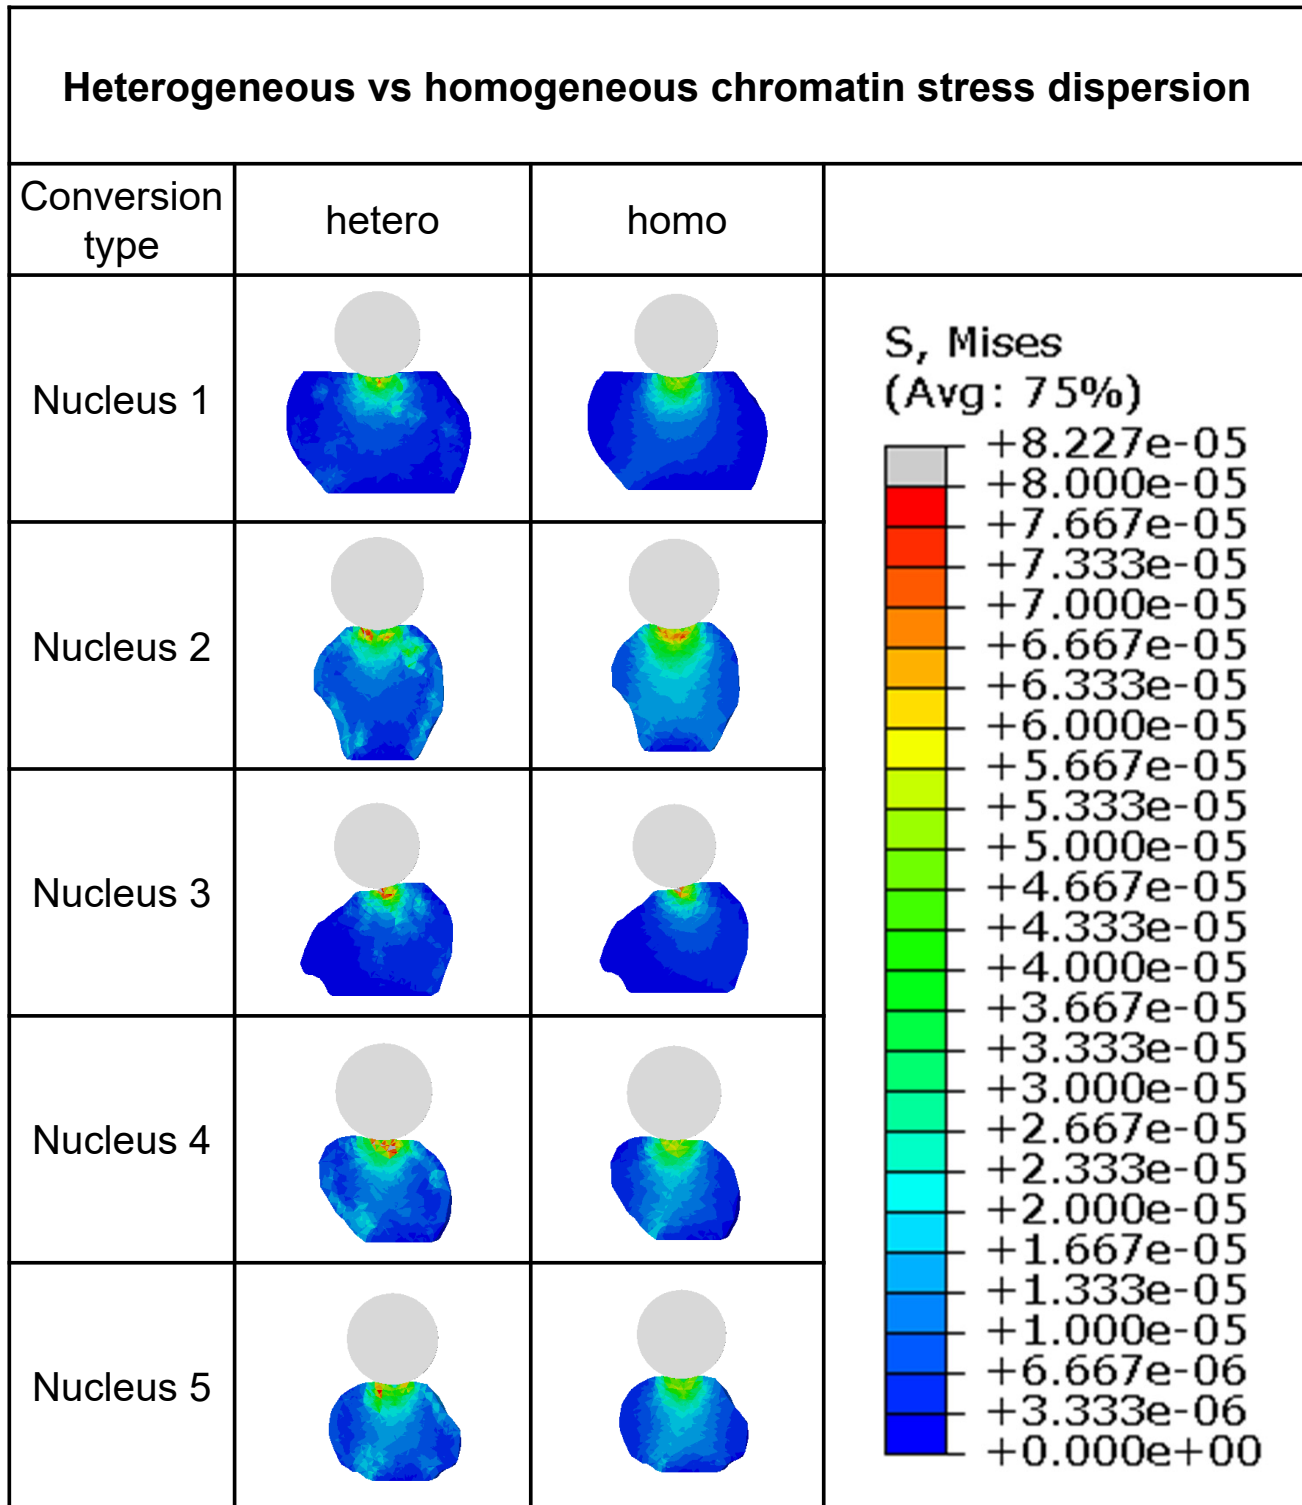

**Figure S4. Heterogeneous vs Homogeneous stress distribution.** Nuclei models 1-5 were created with optimized heterogeneous and homogeneous conversion factors. The nucleus models then underwent a simulated atomic force microscopy experiment with nucleus cross sections for the heterogeneous nuclei showing stress dispersions dependent on the chromatin density within the original images (left) as well as homogeneous models showing a stress dispersion not dependent on the original chromatin density (right).

## Supplementary Figure 5

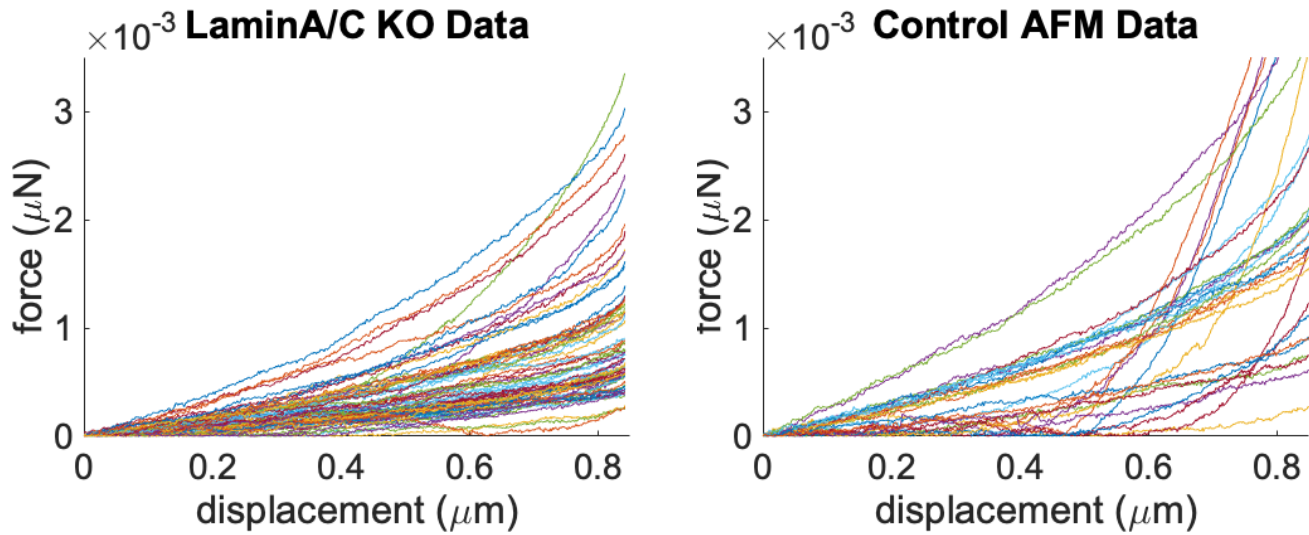

**Figure S5. Atomic Force Microscopy Curves** Atomic force microscopy experiment data for LaminA/C knockdown nuclei (n=72, left) and control nuclei (n=30, right) has been plotted using Matlab.
